# Supplementary material for: Influence of the substituent D/A at the 1,2,3-triazole ring on novel terpyridine derivatives: synthesis and properties
Source: Royal Society of Chemistry journal article supplement (doi:10.1039/c9ra02655j), 2019-01-01
Supplement: c9ra02655j1.pdf [file c9ra02655j1.pdf]

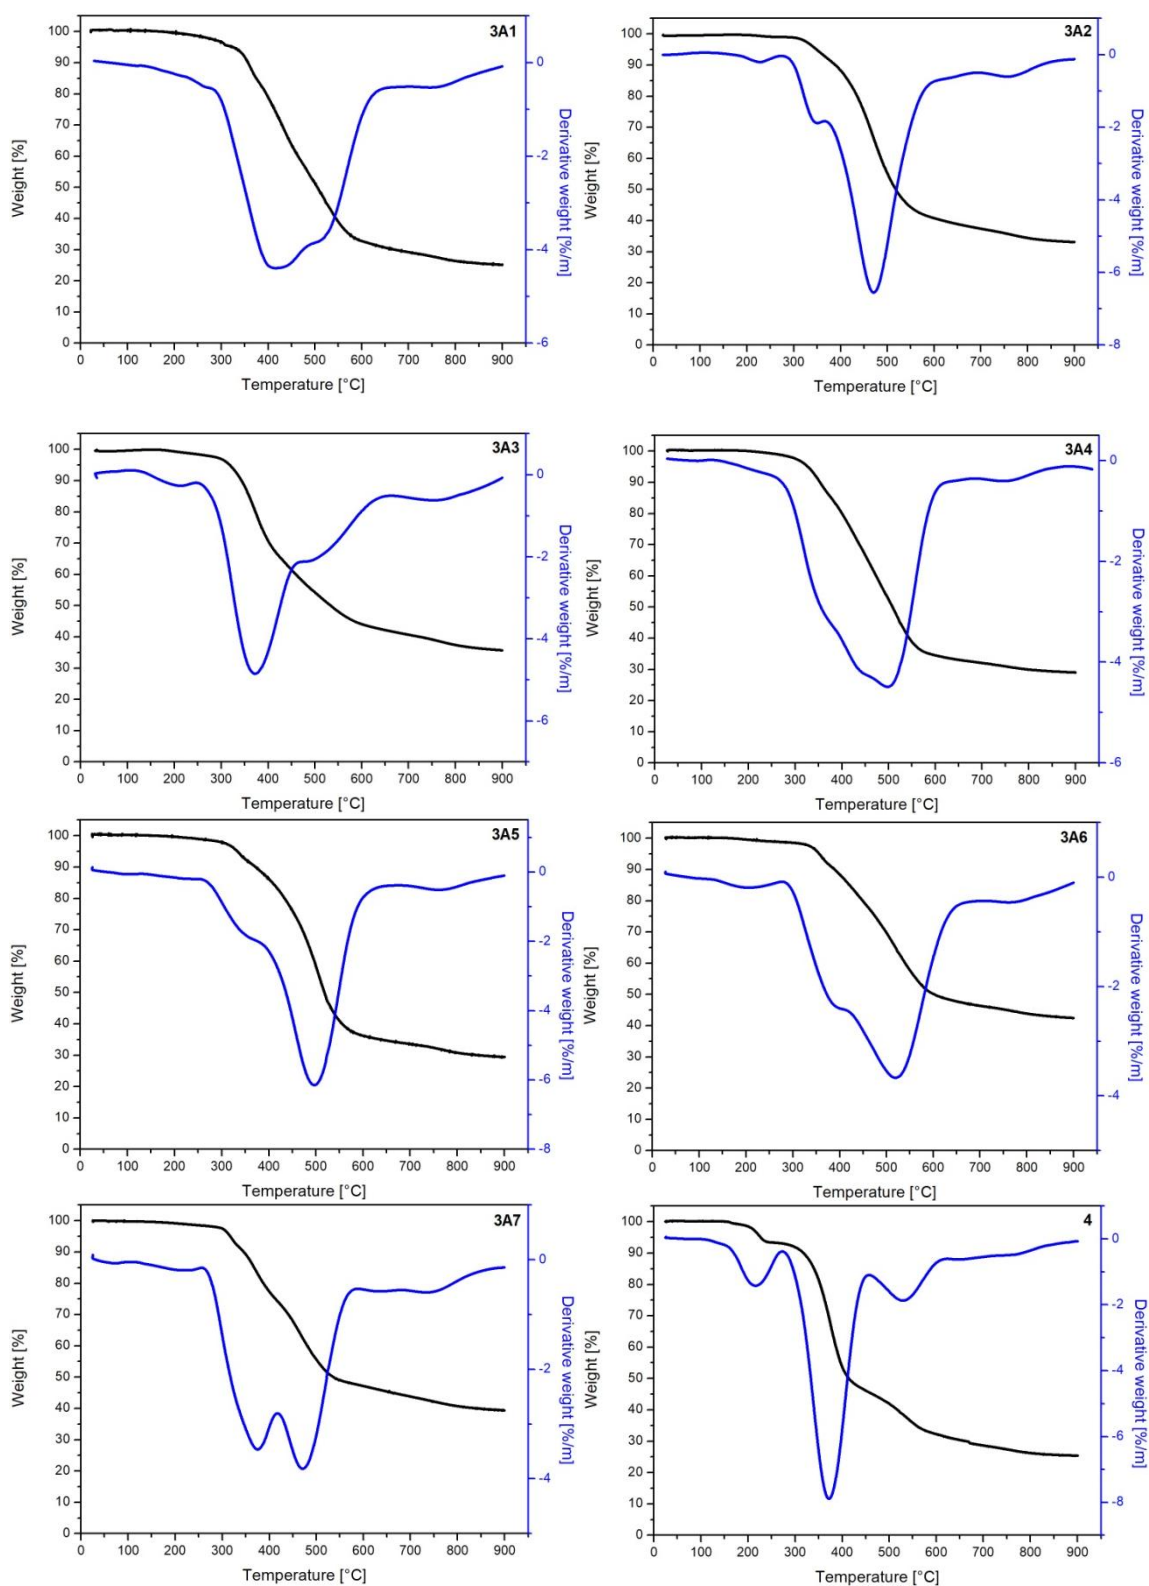

**Figure S1.** TGA and DTG curves of 3A1-3A7 and 4.

**Table S1.** Wavelength maxima [nm] of absorption spectra together with oscillator strengths calculated for **3A2-3A6** molecules with the TD-DFT method.

| Code       | Calculated<br>wavelengths [nm]<br>(oscillator<br>strengths) | Transitions                                                          |
|------------|-------------------------------------------------------------|----------------------------------------------------------------------|
| <b>3A2</b> | 351.34 (0.31)                                               | HOMO->LUMO (98%)                                                     |
|            | 297.56 (0.15)                                               | H-1->LUMO (83%)                                                      |
|            | 287.98 (0.28)                                               | HOMO->L+2 (91%)                                                      |
|            | 283.38 (0.17)                                               | H-4->LUMO (14%), H-3->L+1 (45%), H-2->LUMO (17%)                     |
|            | 280.88 (0.98)                                               | H-3->L+1 (16%), H-2->LUMO (63%)                                      |
|            | 263.40 (0.16)                                               | H-1->L+1 (69%)                                                       |
|            | 262.16 (0.15)                                               | H-7->LUMO (10%), H-2->L+1 (67%)                                      |
|            | 256.98 (0.12)                                               | HOMO->L+4 (32%), HOMO->L+5 (16%), HOMO->L+6 (20%)                    |
|            | 251.04 (0.23)                                               | H-1->L+2 (86%)                                                       |
| <b>3A3</b> | 304.66 (1.02)                                               | HOMO->LUMO (95%)                                                     |
|            | 299.31 (0.13)                                               | H-1->LUMO (84%)                                                      |
|            | 269.37 (0.65)                                               | H-4->LUMO (17%), H-2->LUMO (50%), H-1->L+1 (11%),<br>HOMO->L+2 (10%) |
|            | 253.48 (0.19)                                               | H-1->L+2 (67%), H-1->L+3 (22%)                                       |
|            | 250.30 (0.19)                                               | H-5->L+1 (17%), H-2->L+1 (54%)                                       |
|            | 248.10 (0.04)                                               | HOMO->L+3 (72%)                                                      |
| <b>3A4</b> | 352.97 (0.49)                                               | HOMO->LUMO (97%)                                                     |
|            | 308.80 (1.17)                                               | HOMO->L+2 (89%)                                                      |
|            | 297.99 (0.15)                                               | H-1->LUMO (84%)                                                      |
|            | 279.82 (0.49)                                               | H-5->L+1 (10%), H-2->LUMO (71%)                                      |
|            | 262.91 (0.15)                                               | H-2->L+1 (61%)                                                       |
|            | 252.92 (0.23)                                               | H-1->L+2 (50%), H-1->L+3 (39%)                                       |
|            | 244.36 (0.11)                                               | H-9->L+1 (11%), H-7->L+1 (43%)                                       |
| <b>3A5</b> | 381.65 (0.19)                                               | HOMO->LUMO (98%)                                                     |
|            | 307.01 (0.22)                                               | HOMO->L+2 (51%), HOMO->L+3 (40%)                                     |
|            | 299.04 (0.13)                                               | H-3->LUMO (80%)                                                      |
|            | 292.92 (0.34)                                               | HOMO->L+4 (35%), HOMO->L+7 (24%)                                     |
|            | 288.29 (0.96)                                               | H-2->LUMO (68%), H-1->L+3 (10%)                                      |
|            | 273.39 (0.29)                                               | H-1->L+2 (49%), HOMO->L+6 (16%), HOMO->L+7 (13%)                     |
|            | 266.99 (0.28)                                               | H-4->LUMO (51%), H-1->L+3 (15%)                                      |
|            | 266.16 (0.15)                                               | H-4->L+1 (12%), H-2->L+1 (69%)                                       |
|            | 264.17 (0.36)                                               | H-3->L+1 (24%), H-1->L+3 (37%), HOMO->L+7 (21%)                      |
|            | 263.51 (0.15)                                               | H-8->L+1 (10%), H-4->LUMO (21%), H-3->L+1 (50%)                      |
| <b>3A6</b> | 341.99 (0.32)                                               | HOMO->LUMO (96%)                                                     |
|            | 302.68 (0.13)                                               | H-2->LUMO (33%), H-1->LUMO (30%), HOMO->L+1 (23%)                    |
|            | 302.27 (0.12)                                               | H-2->LUMO (18%), H-1->LUMO (49%), HOMO->L+1 (16%)                    |
|            | 287.29 (1.20)                                               | H-3->LUMO (40%), HOMO->L+3 (30%), HOMO->L+4 (11%)                    |
|            | 281.30 (0.10)                                               | H-3->LUMO (37%), HOMO->L+3 (31%)                                     |
|            | 267.69 (0.11)                                               | H-1->L+2 (13%), HOMO->L+4 (30%), HOMO->L+5 (25%)                     |
|            | 264.57 (0.33)                                               | H-1->L+2 (16%), HOMO->L+5 (22%)                                      |
|            | 252.78 (0.22)                                               | H-2->L+2 (41%), H-2->L+3 (43%)                                       |

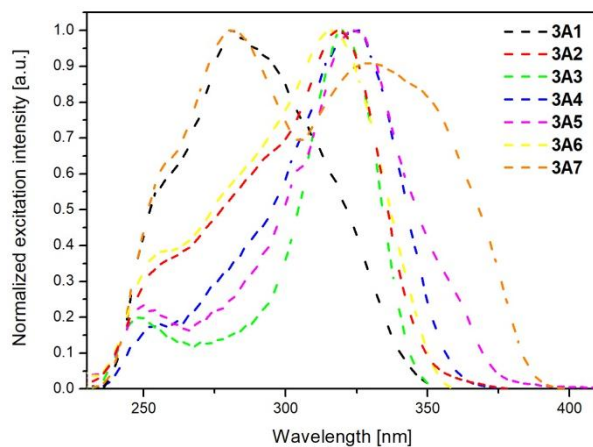

**Figure S2.** Normalized excitation spectra of **3A1-3A7**.

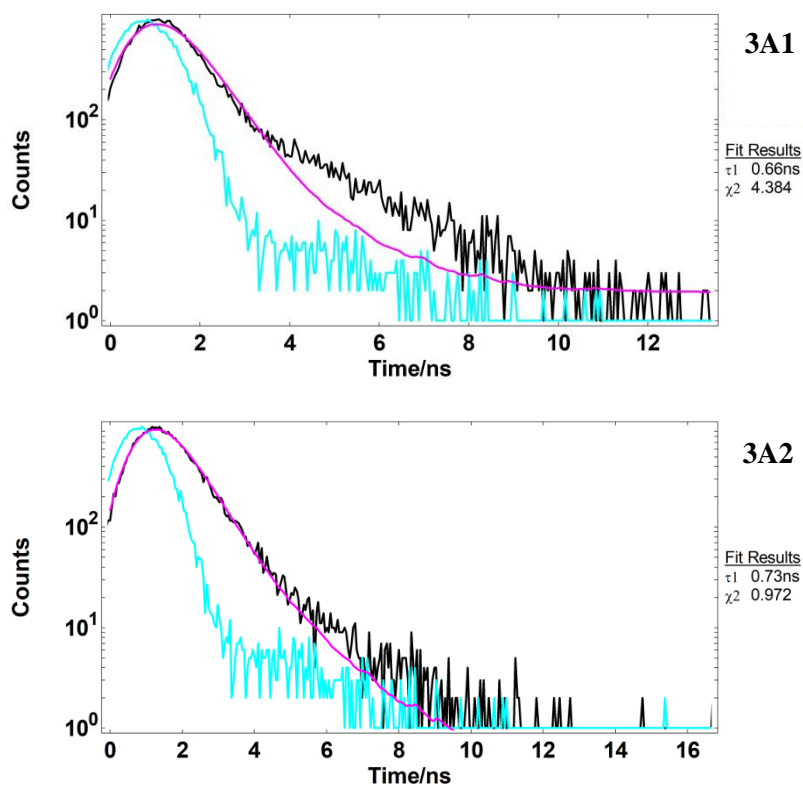

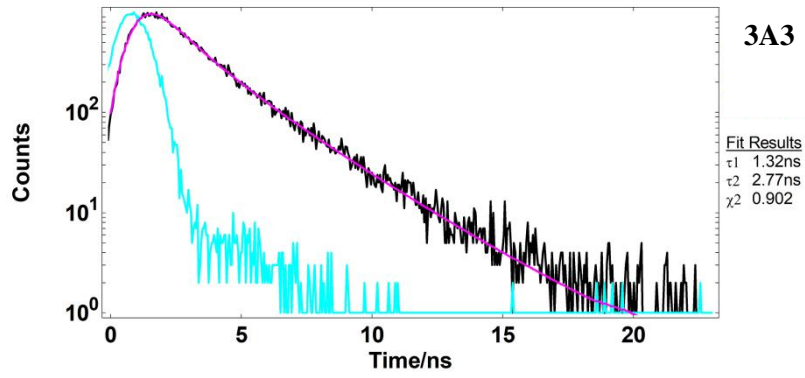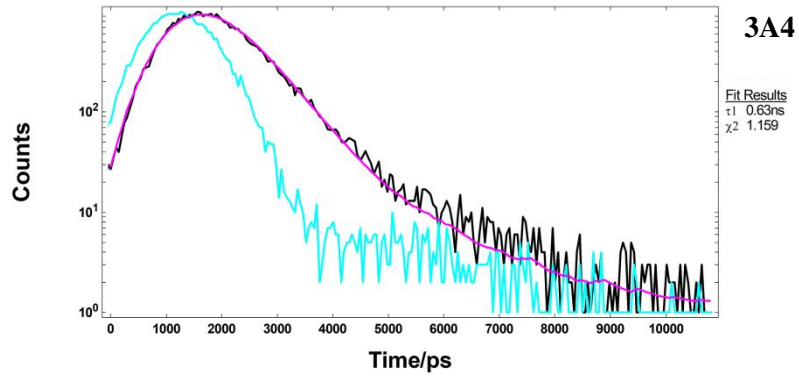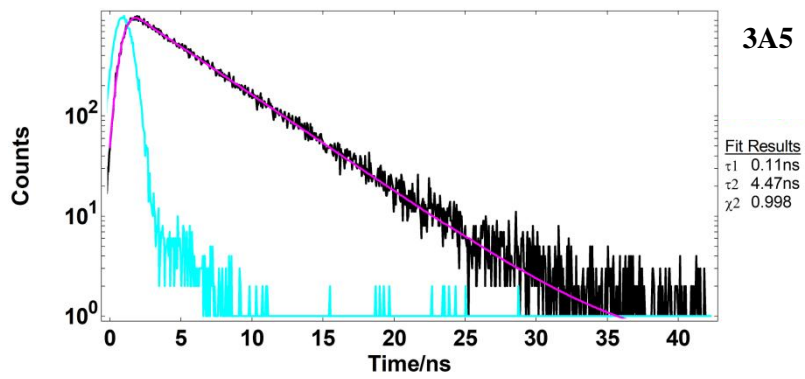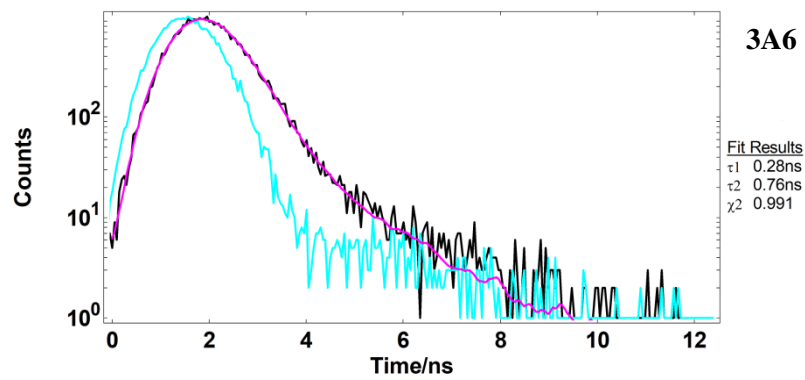

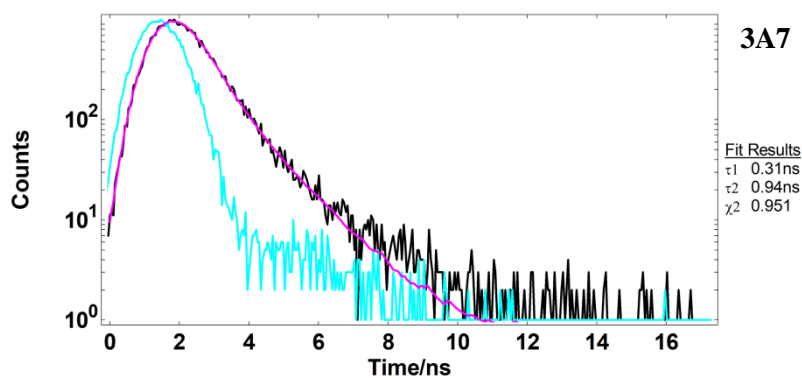

**Figure S3.** Decay curves of compounds **3A1-3A7** in chloroform solution.

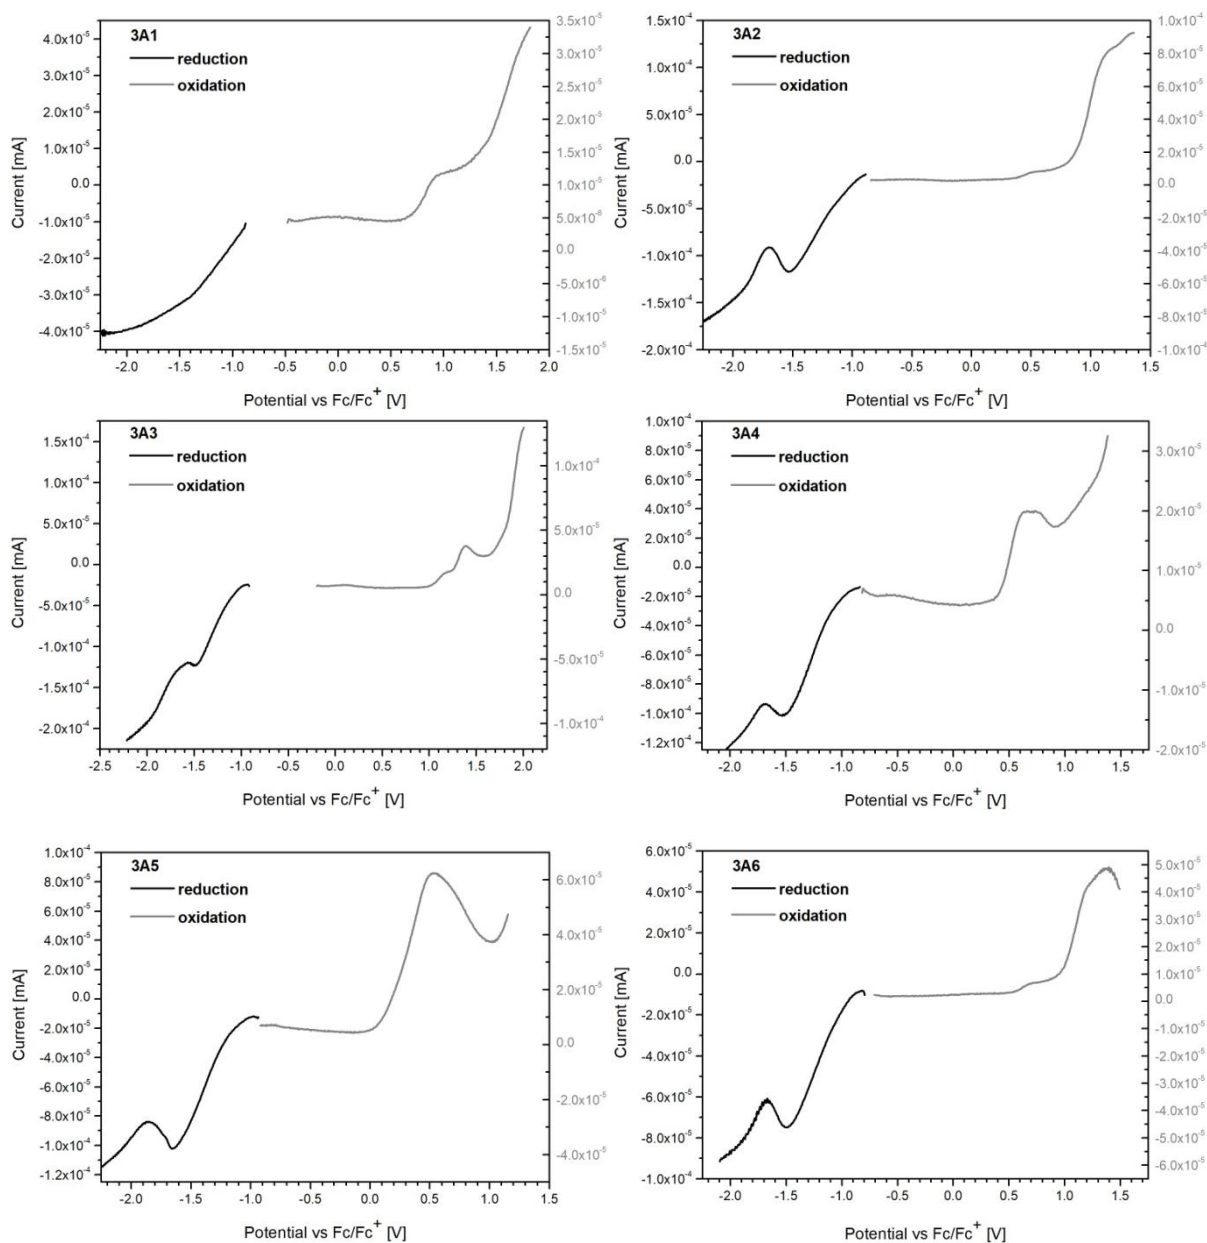

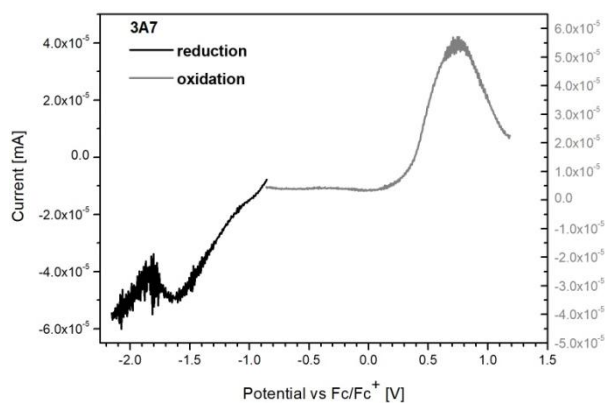

**Figure S4.** Differential pulse voltammetry (DPV) reduction and oxidation of **3A1-3A7**.

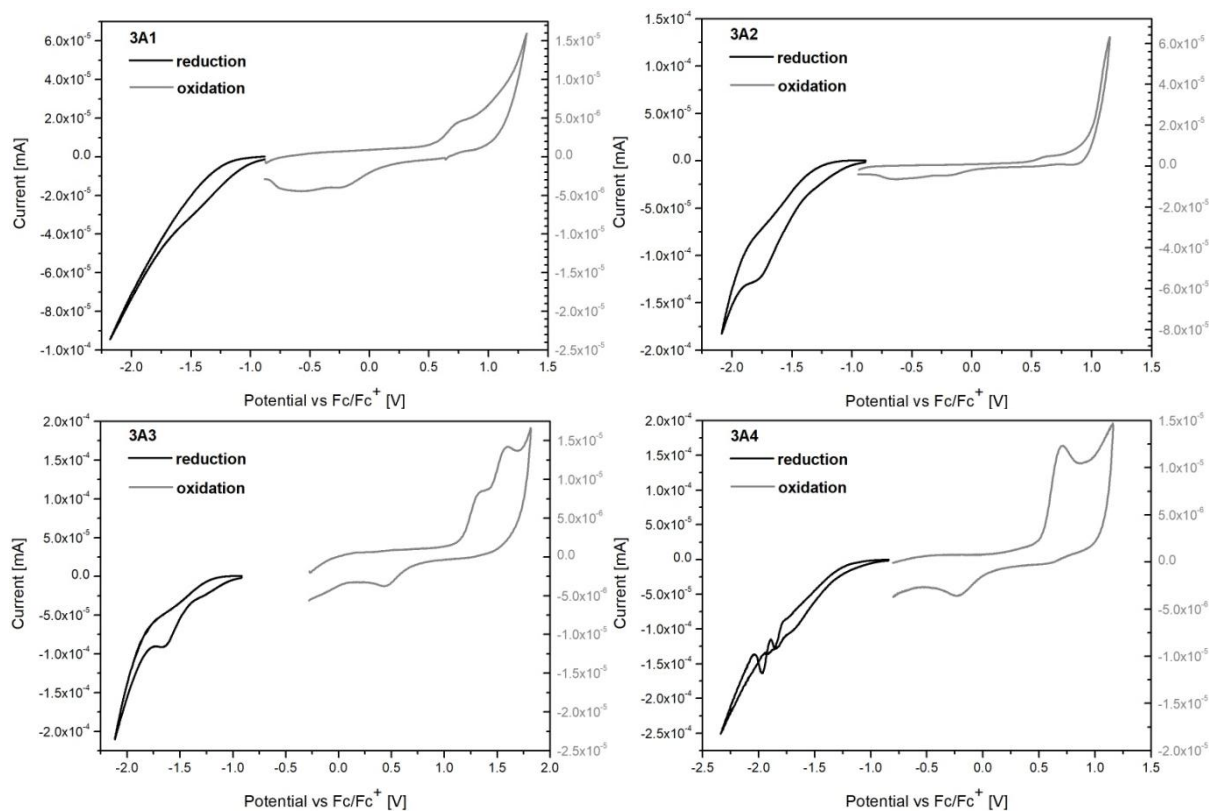

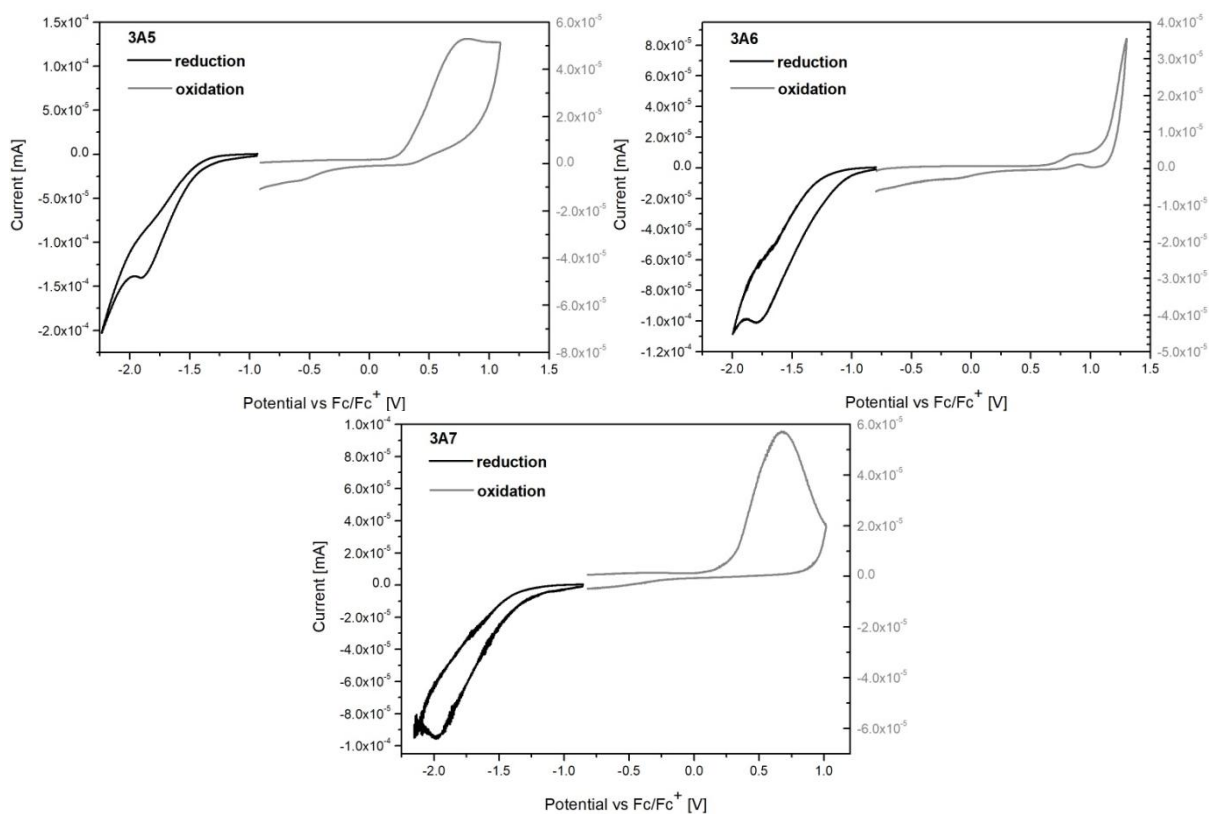

**Figure S5.** Cyclic voltammetry (CV) reduction and oxidation of **3A1-3A7**.

$^1\text{H}$  NMR and  $^{13}\text{C}$  NMR spectra of target compounds 3A1-3A7 and 4

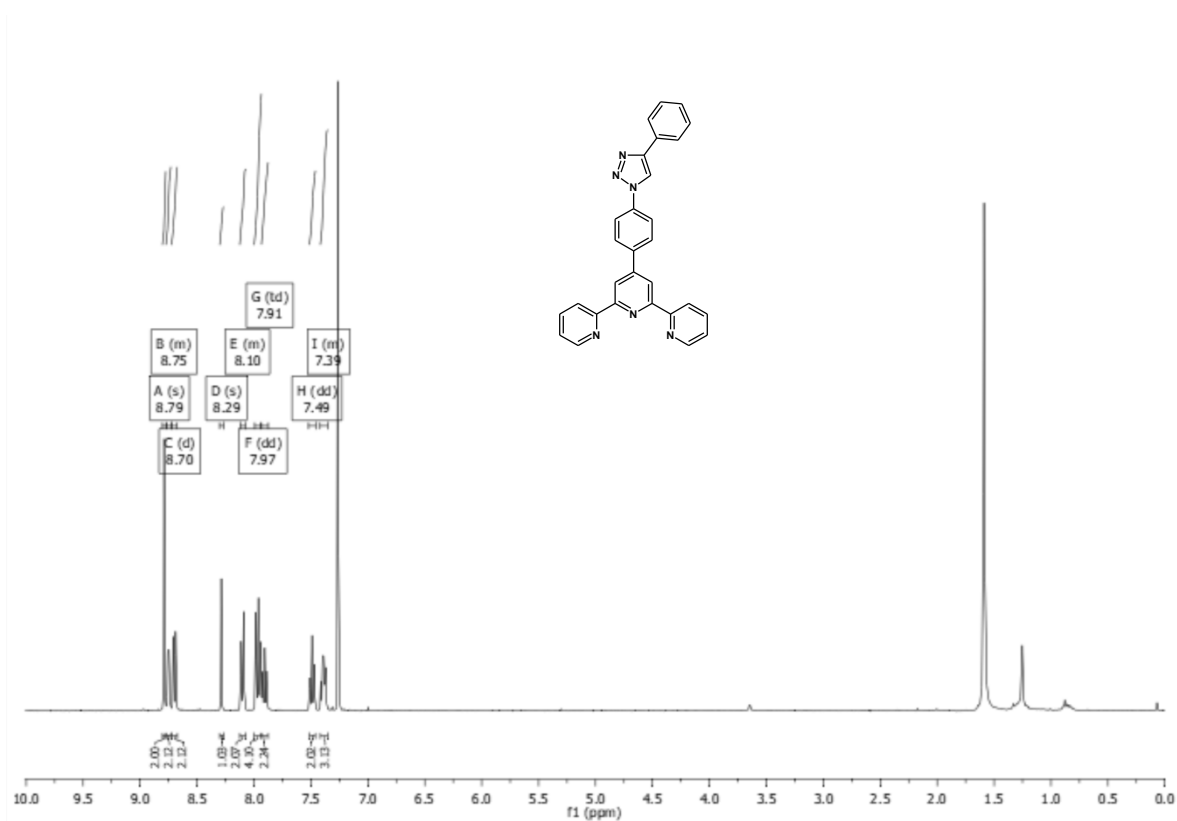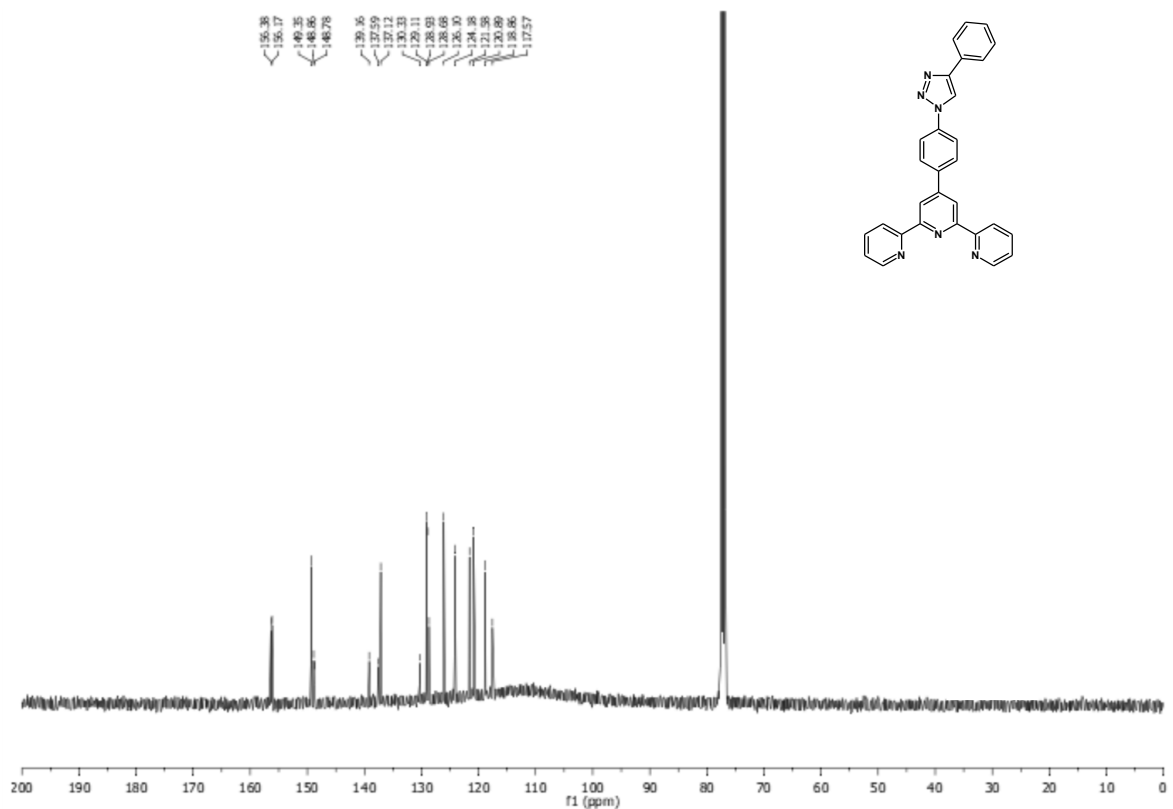



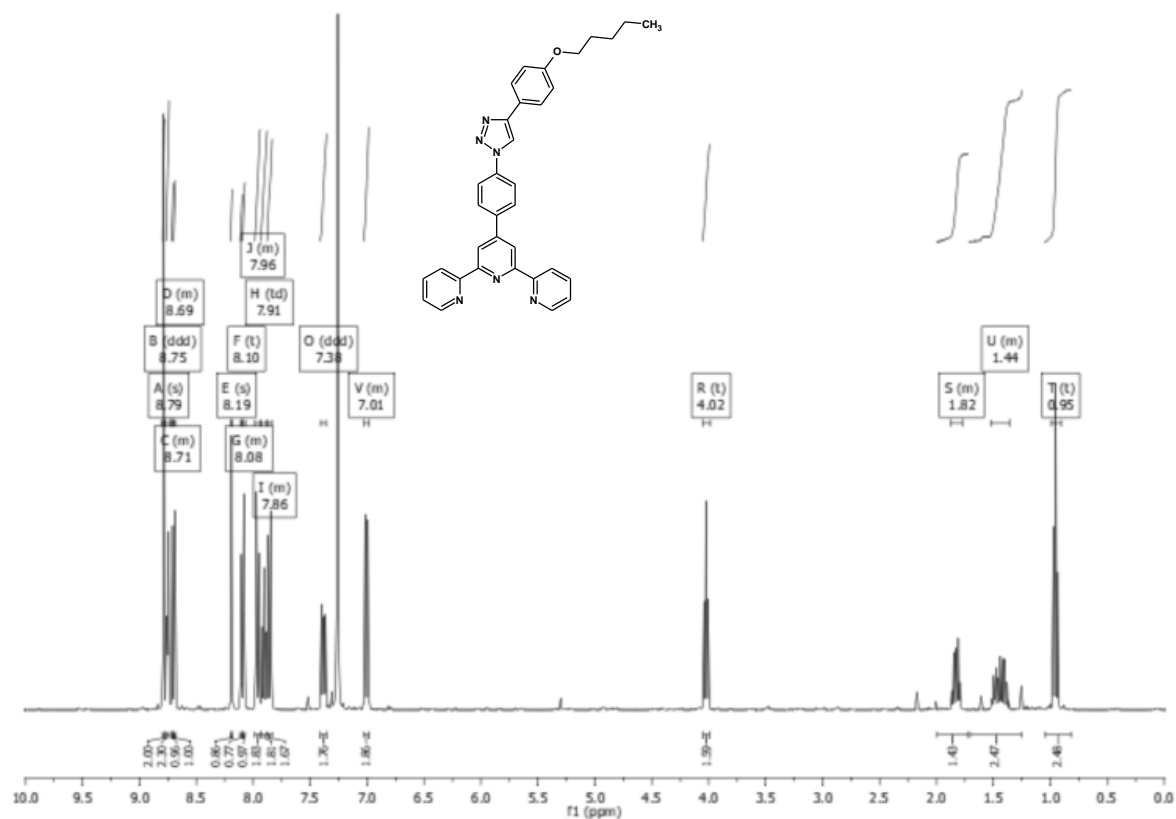

Figure S8.  $^1\text{H}$  NMR plot of 3A2.

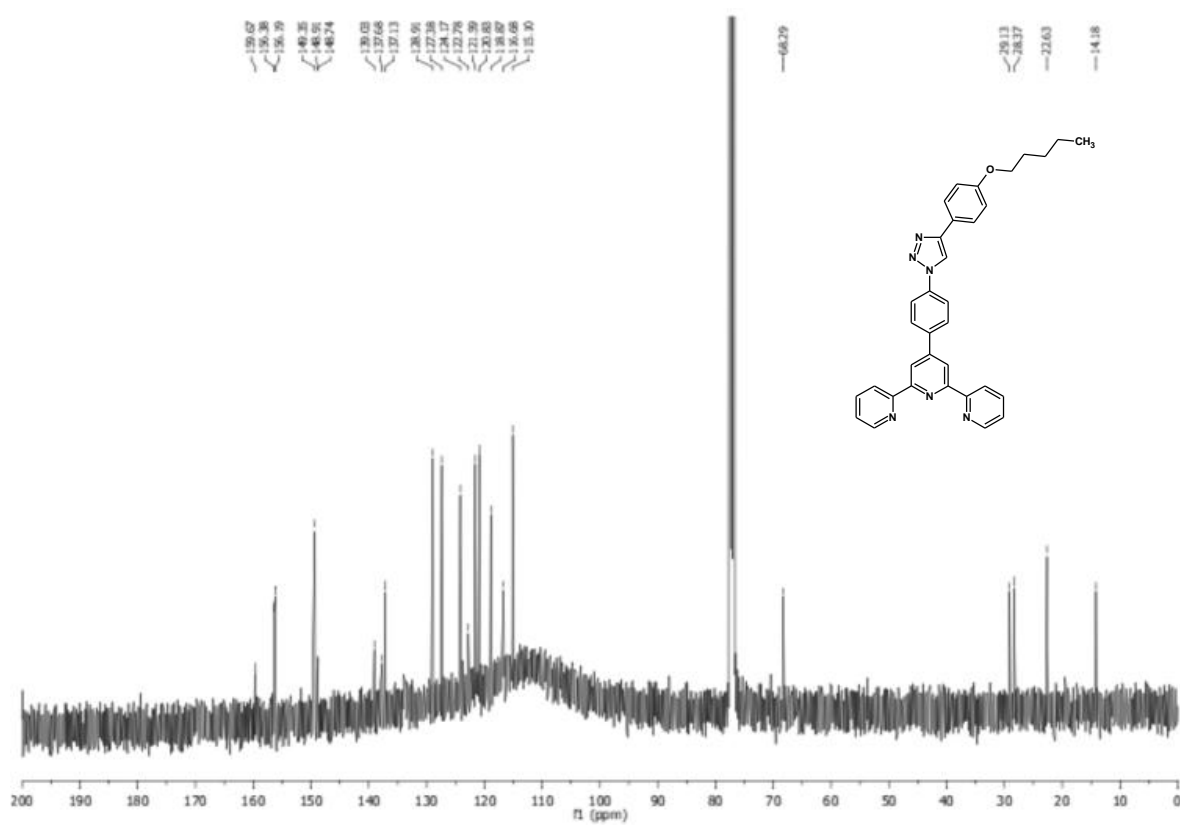

Figure S9.  $^{13}\text{C}$  NMR plot of 3A2.

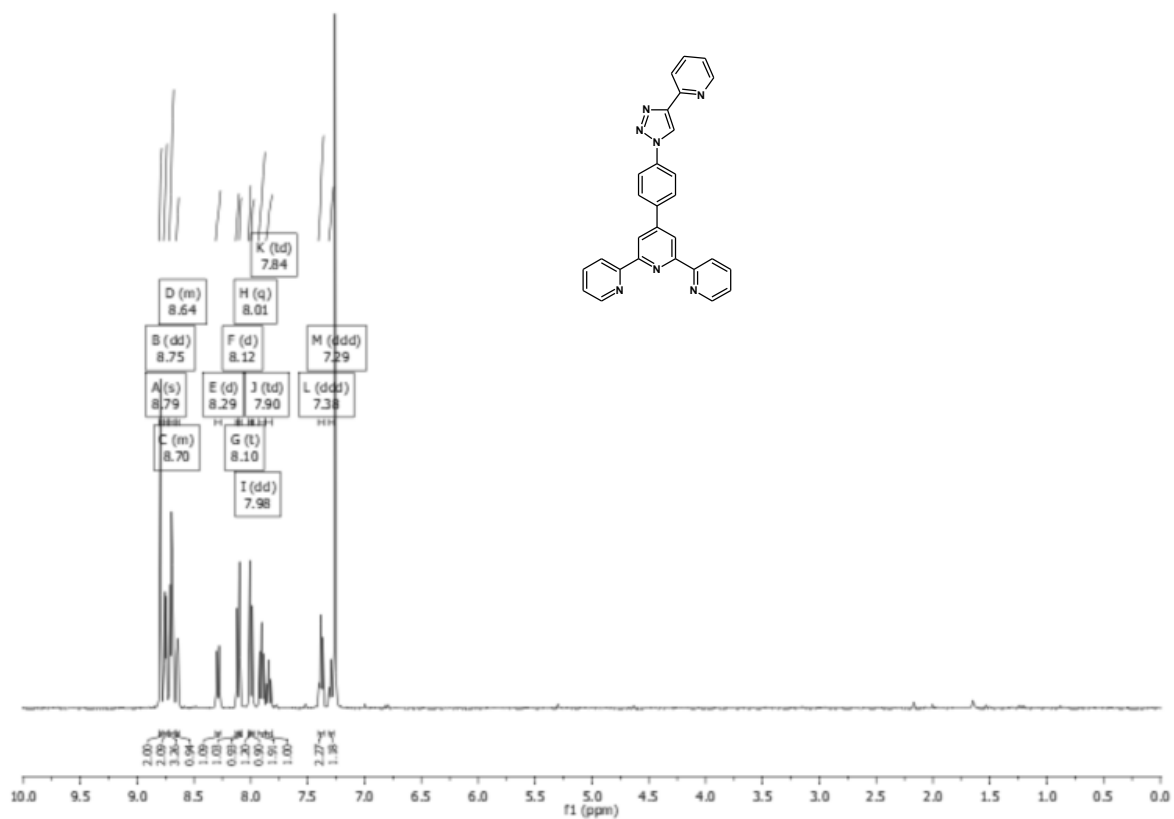

Figure S10.  $^1\text{H}$  NMR plot of 3A3.

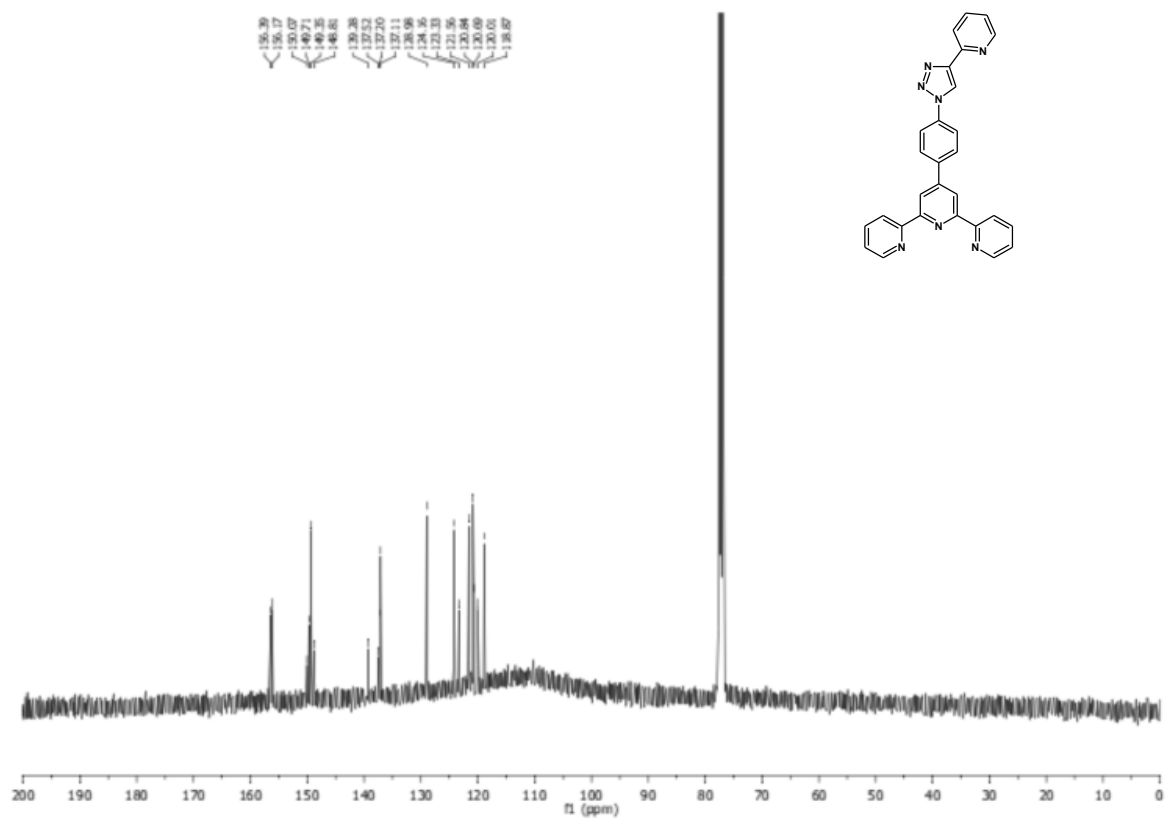

Figure S11.  $^{13}\text{C}$  NMR plot of 3A3.

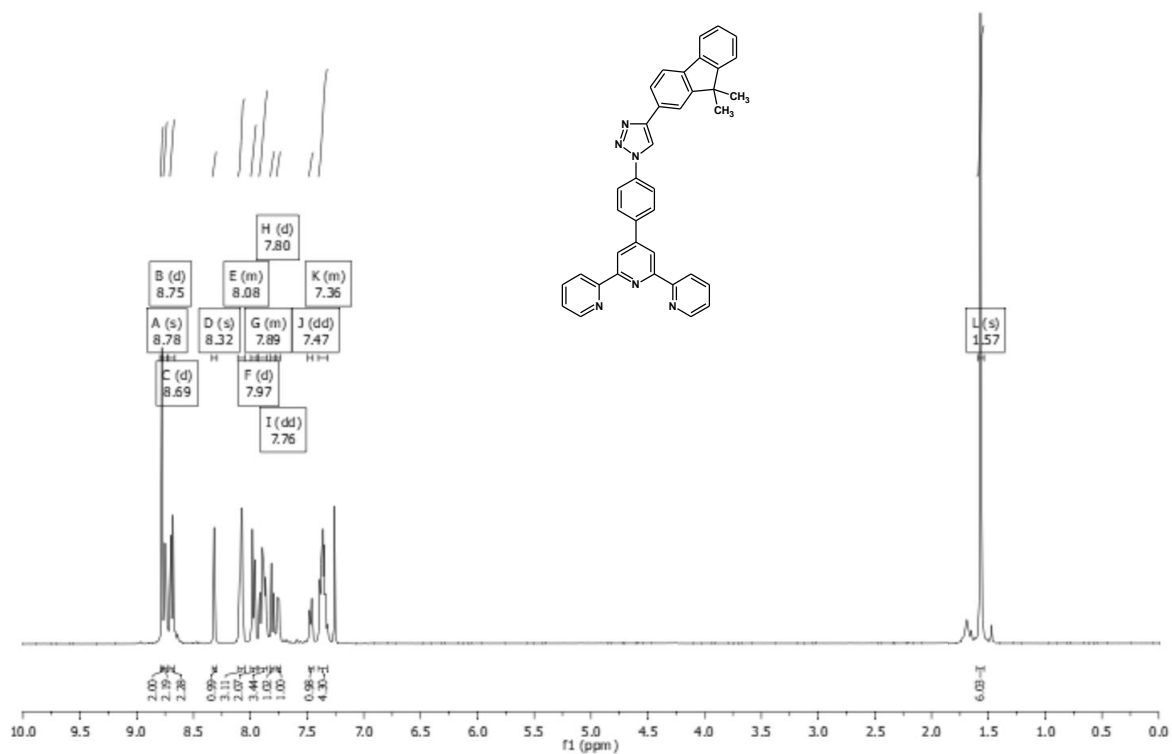

Figure S12.  $^1\text{H}$  NMR plot of 3A4.

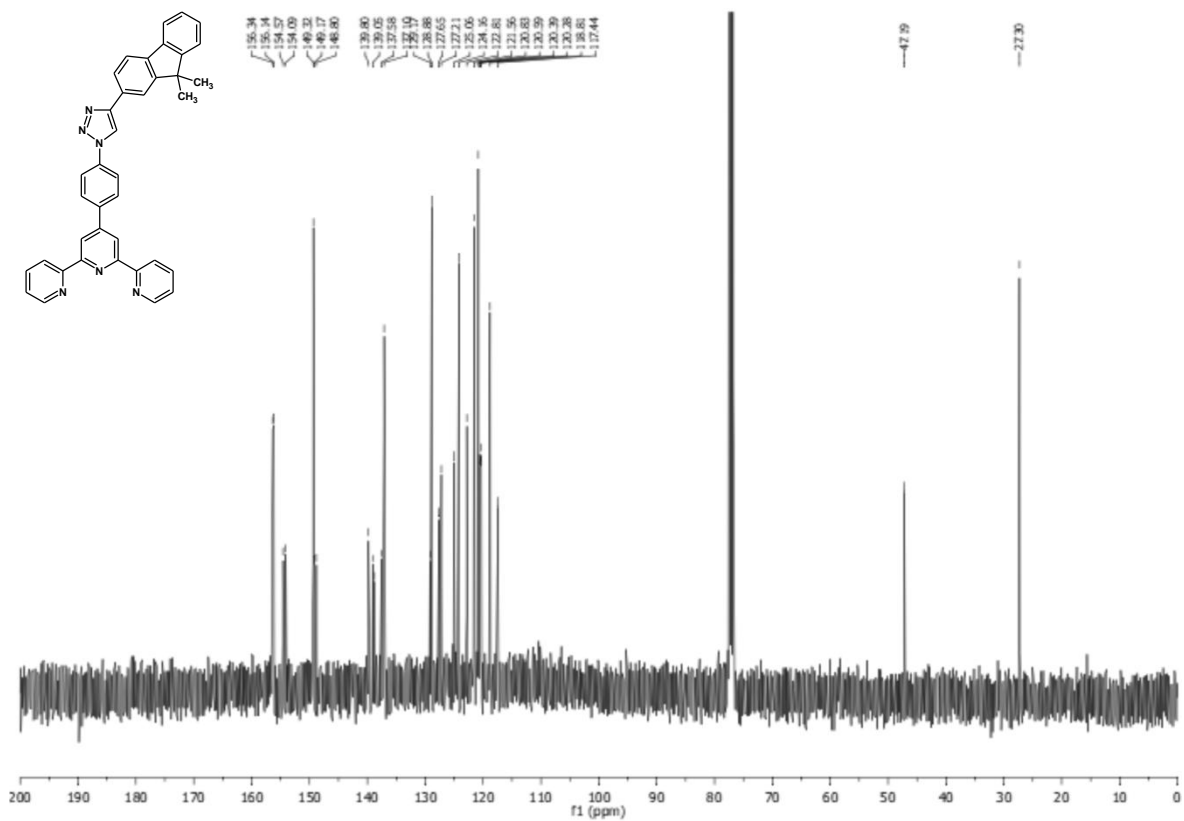

Figure S13.  $^{13}\text{C}$  NMR plot of 3A4.

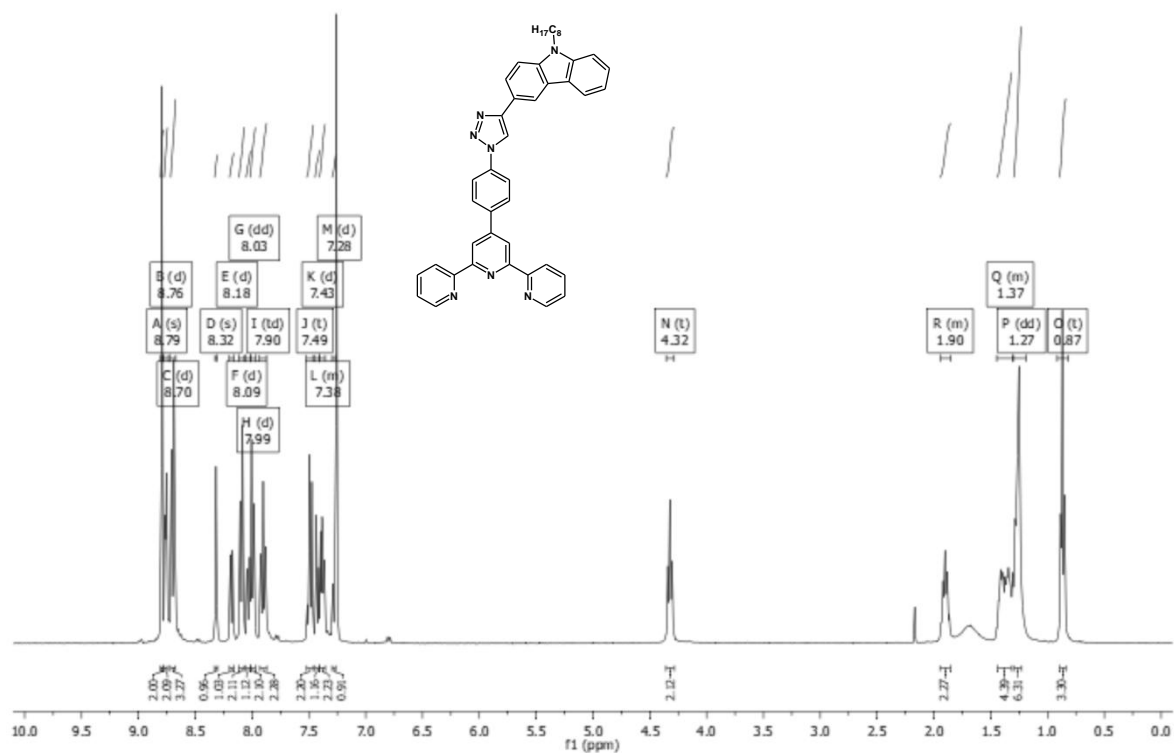

Figure S14.  $^1\text{H}$  NMR plot of 3A5.

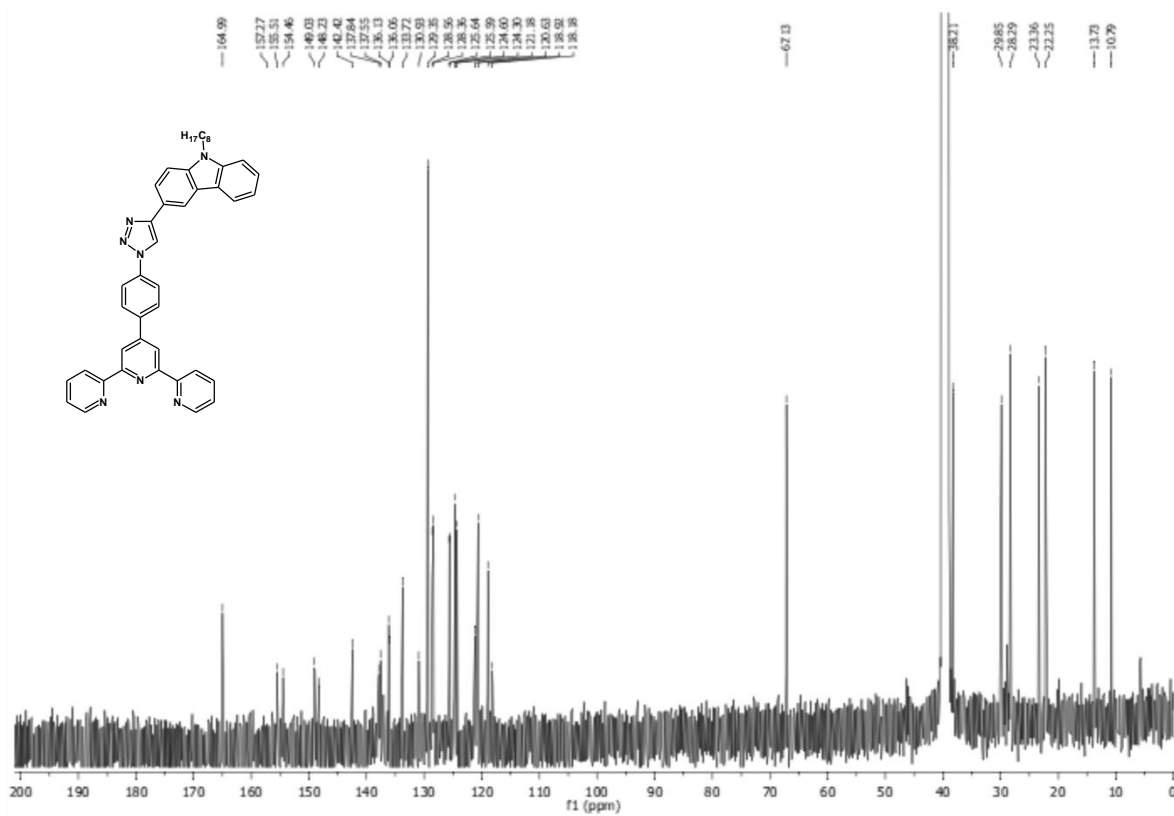

Figure S15.  $^{13}\text{C}$  NMR plot of 3A5.

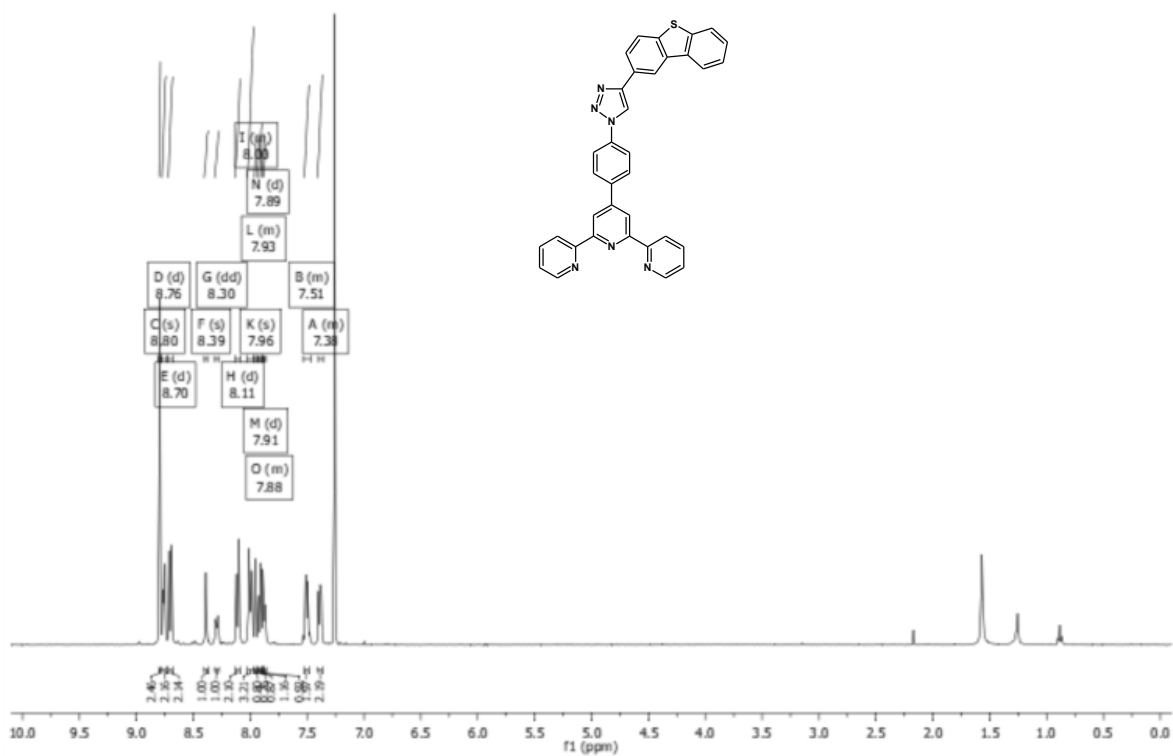

Figure S16.  $^1\text{H}$  NMR plot of 3A6.

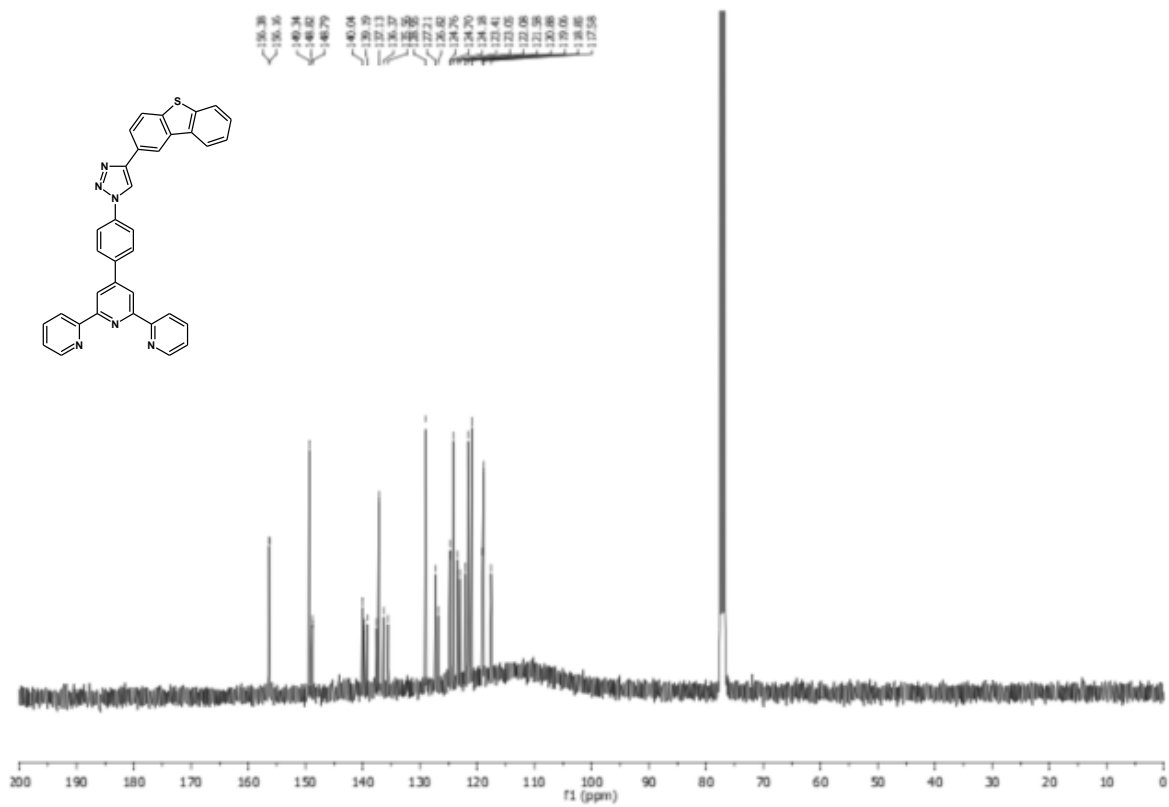

Figure S17.  $^{13}\text{C}$  NMR plot of 3A6.

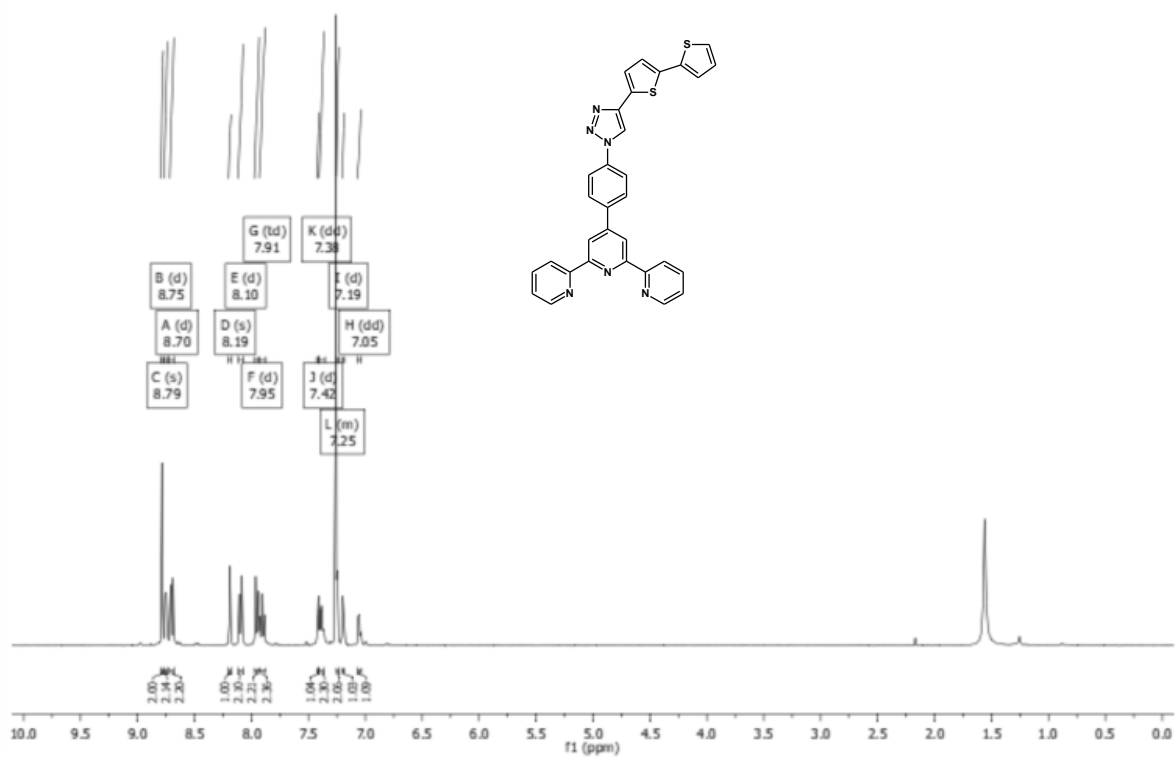

Figure S18.  $^1\text{H}$  NMR plot of 3A7.

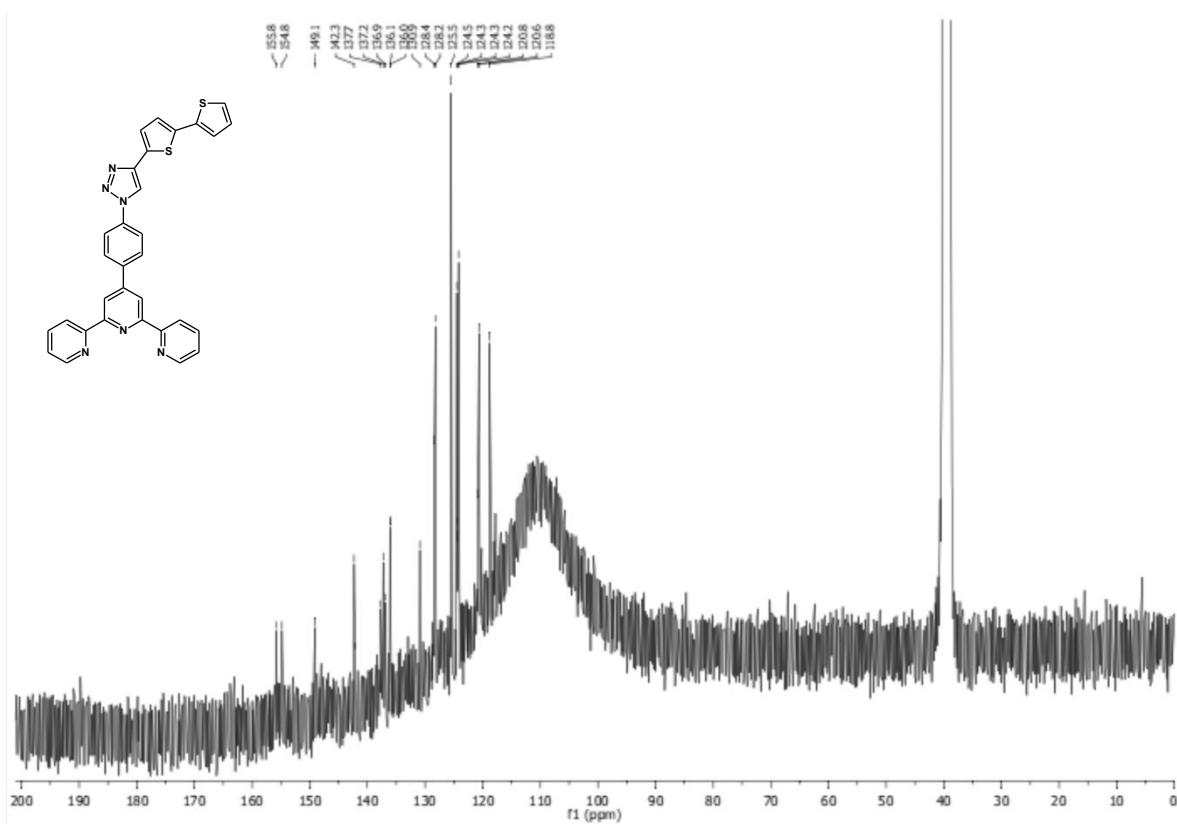

Figure S19.  $^{13}\text{C}$  NMR plot of 3A7.

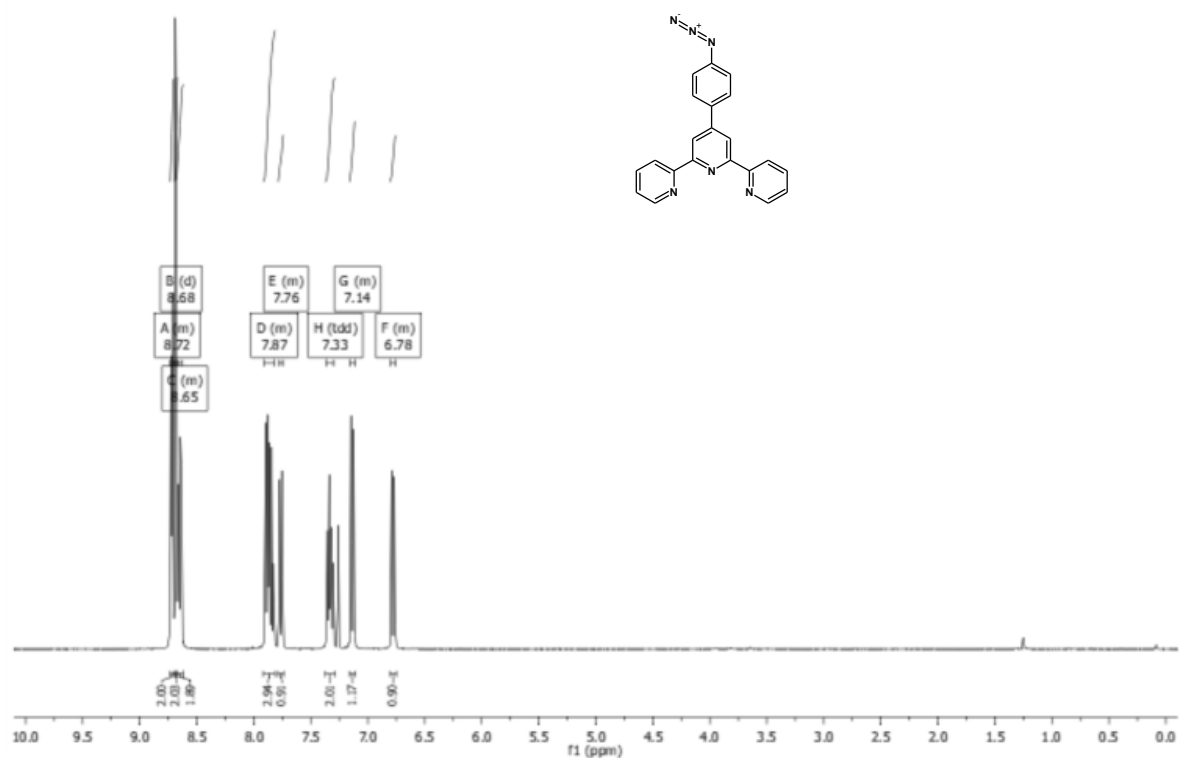

Figure S20.  $^1\text{H}$  NMR plot of 4.

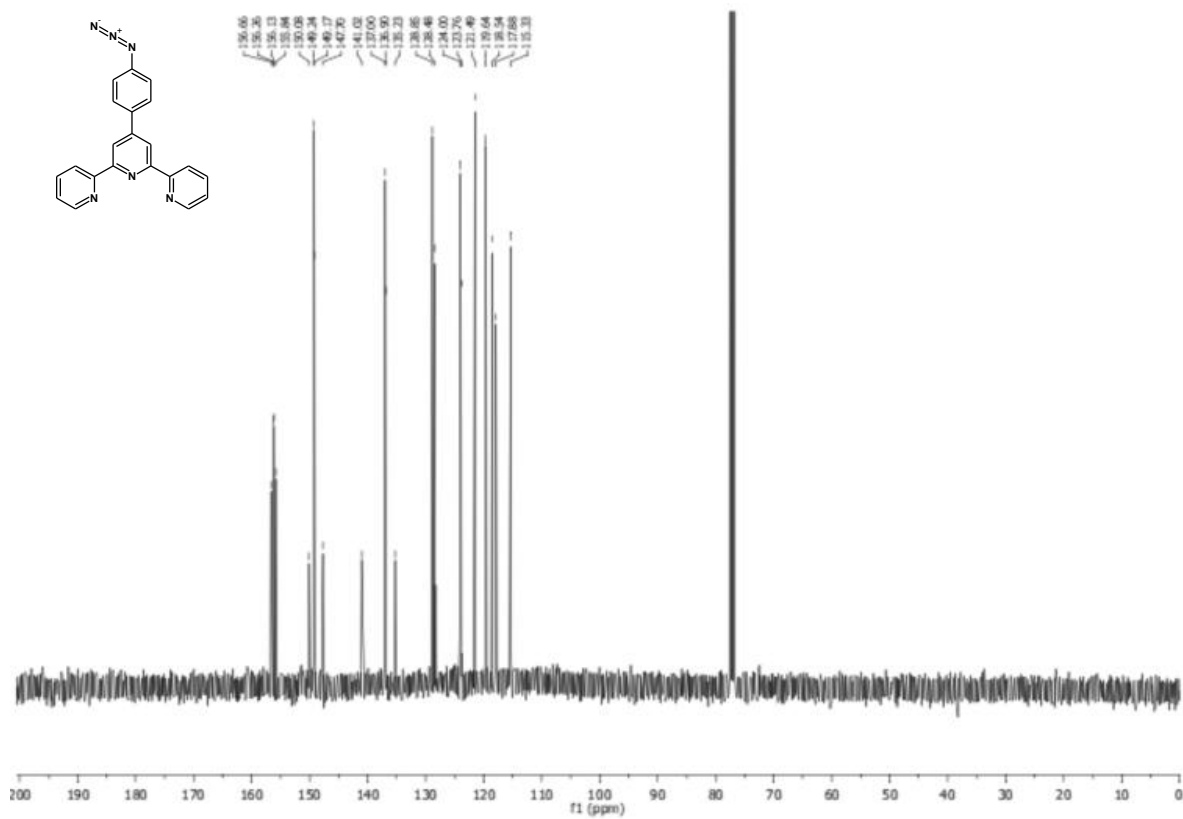

Figure S21.  $^{13}\text{C}$  NMR plot of 4.

## MS spectra of target compounds 3A1-3A7 and 4

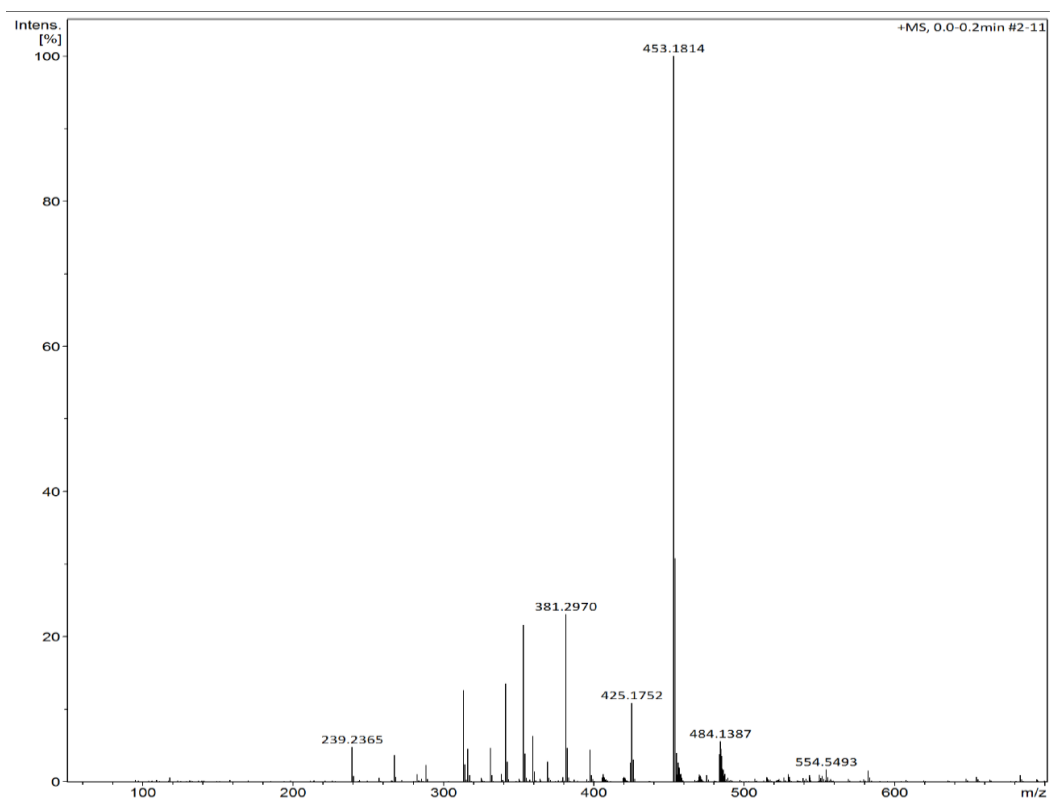

Figure S22. MS spectrum of 3A1.

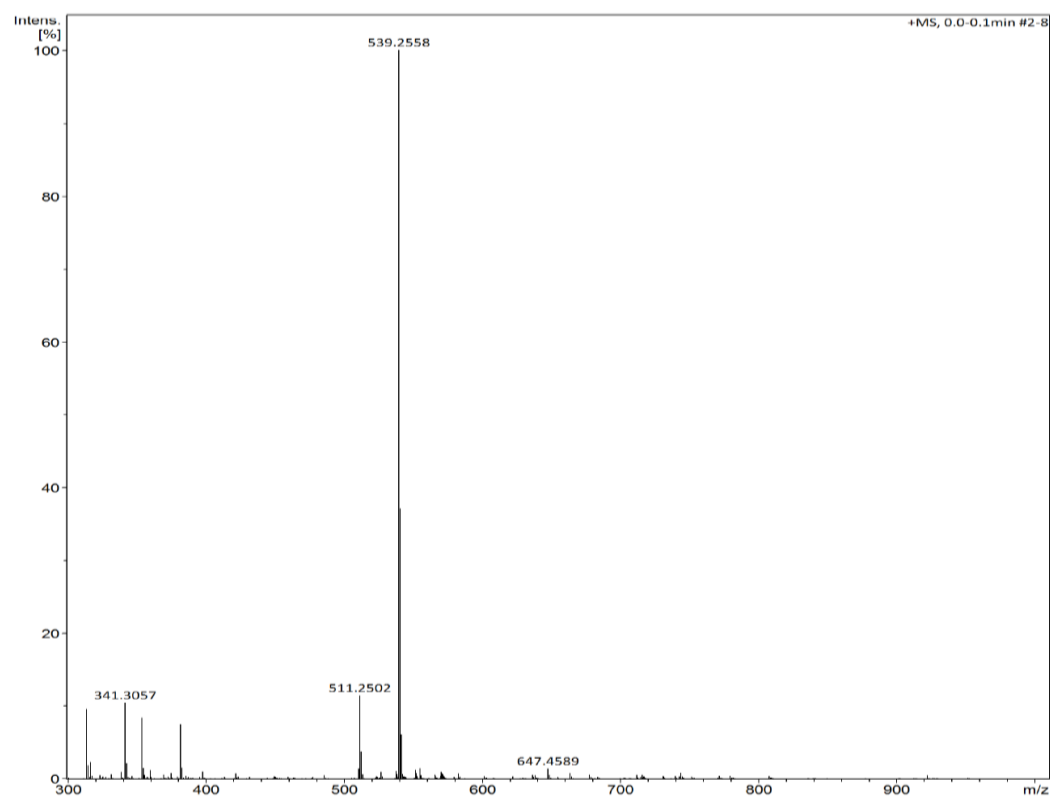

Figure S23. MS spectrum of 3A2.



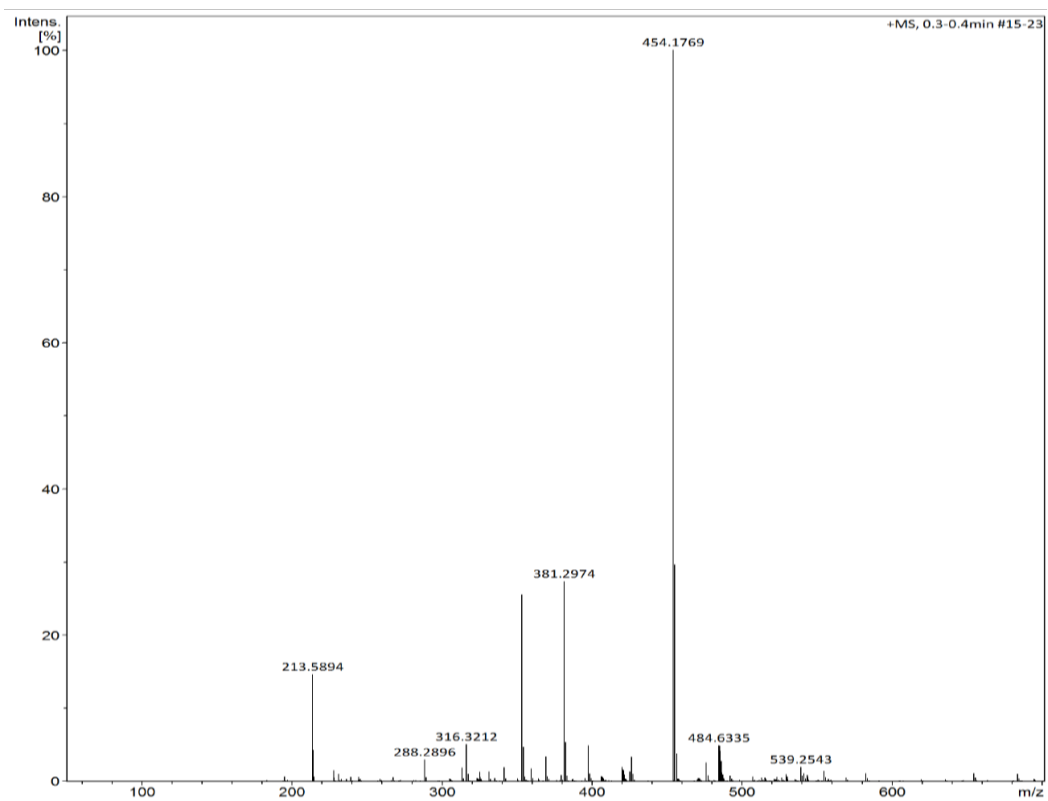

Figure S24. MS spectrum of 3A3.

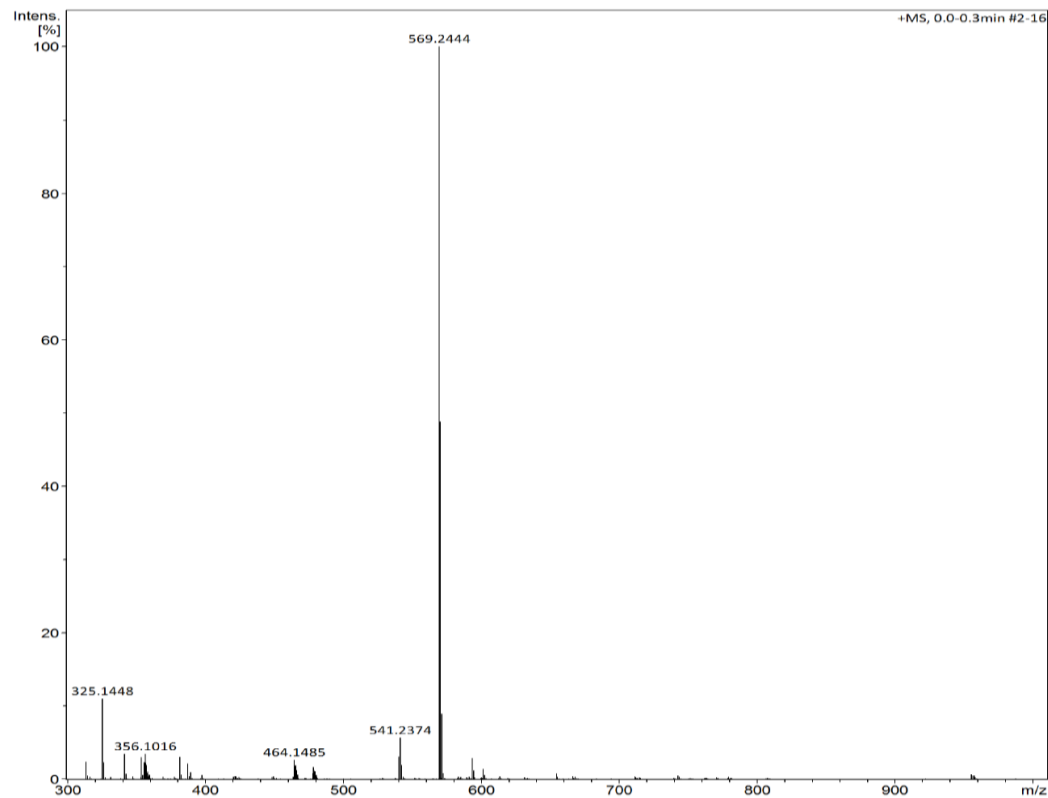

Figure S25. MS spectrum of 3A4.

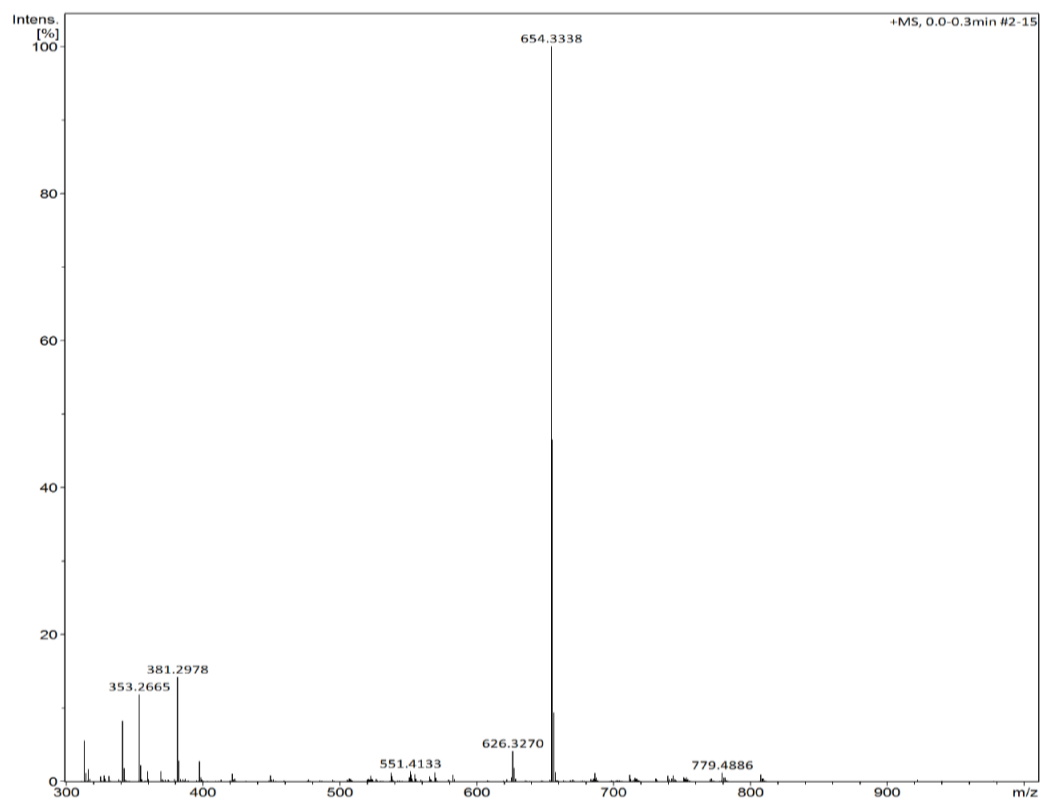

**Figure S26.** MS spectrum of 3A5.

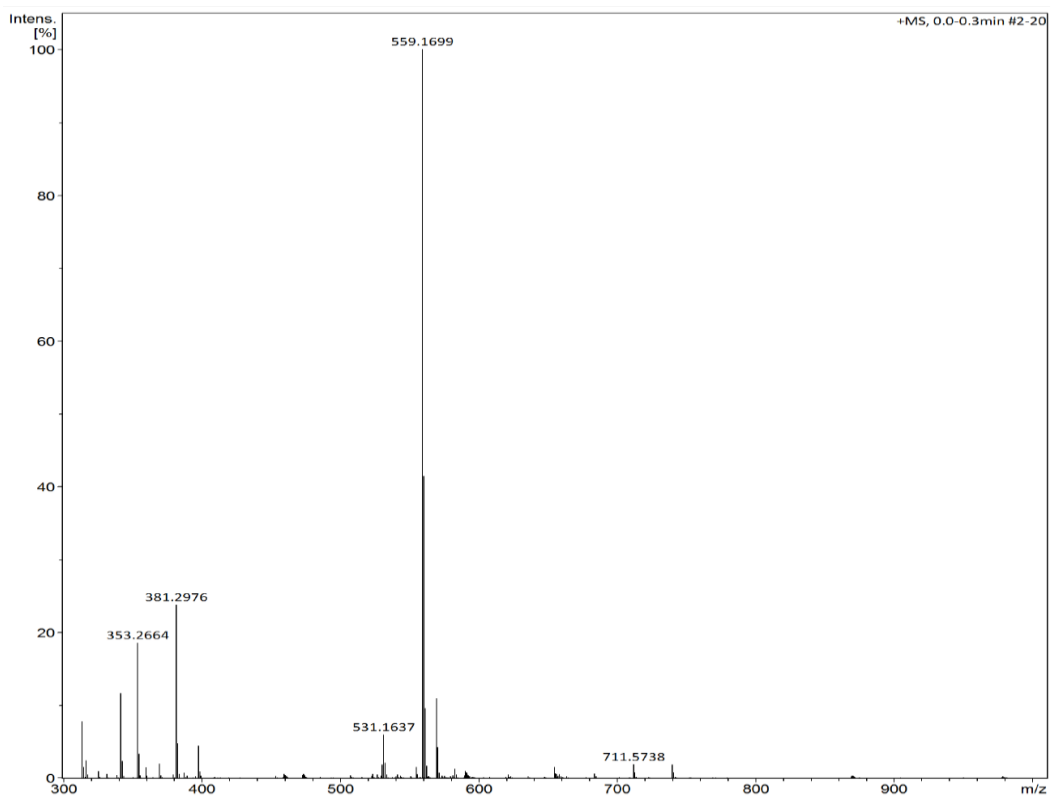

**Figure S27.** MS spectrum of 3A6.

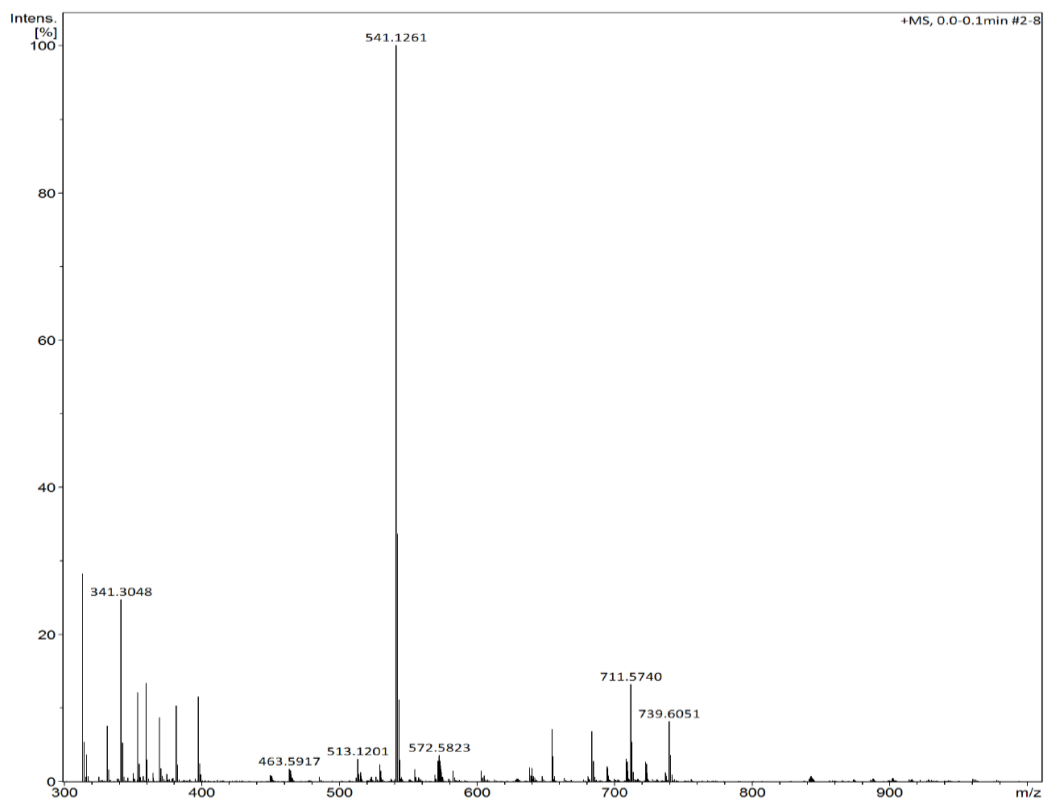

Figure S28. MS spectrum of 3A7.

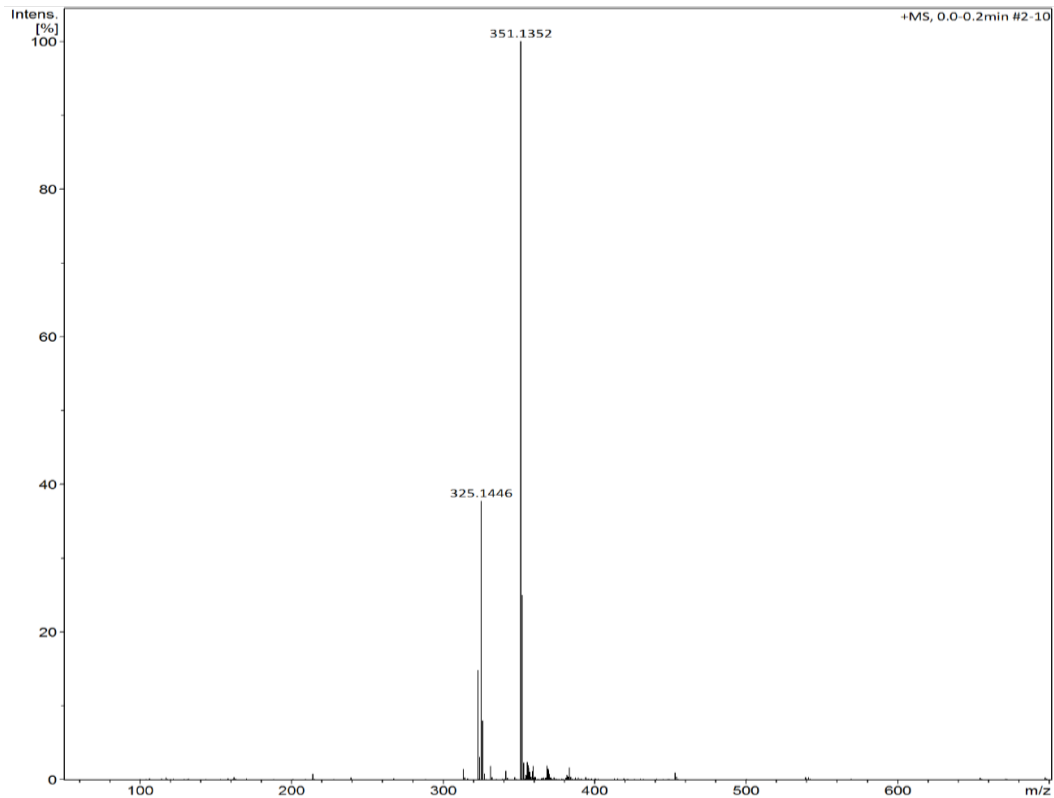

Figure S29. MS spectrum of 4.

Cartesian coordinates of DFT-optimized structure of **3A1** by B3LYP /6-31G\*\*/CHCl<sub>3</sub>:  
Charge = 0; multiplicity=1

|   |               |              |              |
|---|---------------|--------------|--------------|
| C | -4.175717000  | -0.054245000 | 0.001640000  |
| C | -5.177481000  | -1.024635000 | 0.127018000  |
| C | -6.522988000  | -0.633768000 | 0.146166000  |
| N | -6.905239000  | 0.649410000  | 0.062987000  |
| C | -5.954300000  | 1.588818000  | -0.049367000 |
| C | -4.587608000  | 1.281082000  | -0.090132000 |
| C | -7.607015000  | -1.655123000 | 0.278124000  |
| C | -7.482794000  | -2.915365000 | -0.326085000 |
| C | -8.515150000  | -3.839595000 | -0.183027000 |
| C | -9.639248000  | -3.479990000 | 0.557145000  |
| C | -9.674478000  | -2.201624000 | 1.117948000  |
| N | -8.693288000  | -1.302915000 | 0.989513000  |
| C | -6.414289000  | 3.008089000  | -0.151695000 |
| N | -7.555914000  | 3.232065000  | -0.827521000 |
| C | -7.981525000  | 4.494762000  | -0.934173000 |
| C | -7.314249000  | 5.591469000  | -0.384655000 |
| C | -6.136255000  | 5.355308000  | 0.320444000  |
| C | -5.677607000  | 4.045323000  | 0.439943000  |
| C | -2.740452000  | -0.427690000 | -0.034007000 |
| C | -2.318217000  | -1.610045000 | -0.665593000 |
| C | -0.975088000  | -1.965778000 | -0.710001000 |
| C | -0.024950000  | -1.139725000 | -0.102264000 |
| C | -0.419843000  | 0.035523000  | 0.542636000  |
| C | -1.766032000  | 0.387072000  | 0.564681000  |
| N | 1.348013000   | -1.506713000 | -0.142240000 |
| C | 2.450581000   | -0.711241000 | -0.110518000 |
| C | 3.521461000   | -1.584105000 | -0.170910000 |
| N | 3.012010000   | -2.857197000 | -0.235104000 |
| N | 1.712732000   | -2.815281000 | -0.217132000 |
| C | 4.965692000   | -1.317899000 | -0.179786000 |
| C | 5.876754000   | -2.384312000 | -0.259341000 |
| C | 7.248939000   | -2.142655000 | -0.269494000 |
| C | 7.736363000   | -0.835385000 | -0.201533000 |
| C | 6.837830000   | 0.231150000  | -0.122346000 |
| C | 5.464831000   | -0.006651000 | -0.111136000 |
| H | -4.912955000  | -2.068374000 | 0.251873000  |
| H | -3.857530000  | 2.068929000  | -0.237343000 |
| H | -6.606463000  | -3.157729000 | -0.917317000 |
| H | -8.444832000  | -4.817686000 | -0.649112000 |
| H | -10.469491000 | -4.164407000 | 0.696000000  |
| H | -10.536390000 | -1.885887000 | 1.703169000  |
| H | -8.905336000  | 4.640856000  | -1.491213000 |
| H | -7.712001000  | 6.593659000  | -0.504788000 |
| H | -5.587523000  | 6.173168000  | 0.777475000  |
| H | -4.776737000  | 3.826987000  | 1.003065000  |
| H | -3.045414000  | -2.245737000 | -1.159873000 |
| H | -0.655165000  | -2.868110000 | -1.216084000 |

|   |              |              |              |
|---|--------------|--------------|--------------|
| H | 0.309793000  | 0.658207000  | 1.048351000  |
| H | -2.064478000 | 1.288804000  | 1.088884000  |
| H | 2.385999000  | 0.363402000  | -0.079408000 |
| H | 5.496427000  | -3.398472000 | -0.312510000 |
| H | 7.939759000  | -2.978416000 | -0.331057000 |
| H | 7.206004000  | 1.251407000  | -0.068762000 |
| H | 4.779859000  | 0.833826000  | -0.048288000 |
| H | 8.806025000  | -0.648953000 | -0.210047000 |

Cartesian coordinates of DFT-optimized structure of **3A2** by B3LYP /6-31G\*\*/CHCl<sub>3</sub>:  
Charge = 0; multiplicity=1

|   |              |              |              |
|---|--------------|--------------|--------------|
| C | -2.044175000 | -1.042298000 | 0.018224000  |
| C | -3.259358000 | -1.717028000 | -0.152511000 |
| C | -3.277737000 | -3.117933000 | -0.174438000 |
| N | -2.165470000 | -3.858368000 | -0.049294000 |
| C | -0.994031000 | -3.222929000 | 0.108972000  |
| C | -0.891648000 | -1.826002000 | 0.154278000  |
| C | -4.565603000 | -3.854783000 | -0.361556000 |
| C | -5.759370000 | -3.363079000 | 0.187690000  |
| C | -6.940316000 | -4.074754000 | -0.011243000 |
| C | -6.895967000 | -5.254403000 | -0.751103000 |
| C | -5.660650000 | -5.668057000 | -1.253600000 |
| N | -4.518147000 | -4.997754000 | -1.070672000 |
| C | 0.224796000  | -4.076822000 | 0.257597000  |
| N | 0.076524000  | -5.244424000 | 0.910575000  |
| C | 1.155532000  | -6.020493000 | 1.057284000  |
| C | 2.423098000  | -5.692828000 | 0.571917000  |
| C | 2.571632000  | -4.486828000 | -0.109581000 |
| C | 1.457925000  | -3.665562000 | -0.270369000 |
| C | -1.982545000 | 0.439394000  | 0.051634000  |
| C | -3.012282000 | 1.191032000  | 0.643085000  |
| C | -2.961437000 | 2.579663000  | 0.682312000  |
| C | -1.873603000 | 3.244579000  | 0.108154000  |
| C | -0.841470000 | 2.520611000  | -0.495236000 |
| C | -0.897142000 | 1.130236000  | -0.511251000 |
| N | -1.827442000 | 4.665145000  | 0.138374000  |
| C | -0.745076000 | 5.489899000  | 0.117830000  |
| C | -1.270667000 | 6.768871000  | 0.155847000  |
| N | -2.638008000 | 6.650330000  | 0.198390000  |
| N | -2.974043000 | 5.392787000  | 0.186593000  |
| C | -0.599974000 | 8.073426000  | 0.161084000  |
| C | -1.345082000 | 9.255266000  | 0.334332000  |
| C | -0.725980000 | 10.495848000 | 0.338927000  |
| C | 0.664816000  | 10.597146000 | 0.170423000  |
| C | 1.421959000  | 9.430518000  | -0.002229000 |
| C | 0.786334000  | 8.188627000  | -0.006725000 |
| H | -4.174971000 | -1.158978000 | -0.310862000 |
| H | 0.068416000  | -1.356953000 | 0.336588000  |
| H | -5.758776000 | -2.453959000 | 0.778785000  |
| H | -7.874283000 | -3.717197000 | 0.411200000  |
| H | -7.788495000 | -5.843506000 | -0.933293000 |
| H | -5.587844000 | -6.585068000 | -1.835676000 |
| H | 1.001673000  | -6.954886000 | 1.594171000  |
| H | 3.260272000  | -6.366157000 | 0.722235000  |
| H | 3.533924000  | -4.192454000 | -0.516981000 |
| H | 1.537870000  | -2.732620000 | -0.817331000 |
| H | -3.849858000 | 0.683764000  | 1.110160000  |
| H | -3.748264000 | 3.150847000  | 1.158920000  |

|   |              |              |              |
|---|--------------|--------------|--------------|
| H | -0.014605000 | 3.033776000  | -0.973284000 |
| H | -0.102626000 | 0.579127000  | -1.003256000 |
| H | 0.265356000  | 5.116925000  | 0.114342000  |
| H | -2.419541000 | 9.187471000  | 0.464984000  |
| H | -1.301100000 | 11.406449000 | 0.472043000  |
| H | 2.495594000  | 9.476151000  | -0.136234000 |
| O | 1.175900000  | 11.859260000 | 0.188380000  |
| C | 2.584990000  | 12.038644000 | -0.004875000 |
| C | 2.872051000  | 13.532365000 | 0.030515000  |
| C | 4.356829000  | 13.847298000 | -0.189358000 |
| C | 4.662234000  | 15.350137000 | -0.162609000 |
| C | 6.143050000  | 15.666036000 | -0.392426000 |
| H | 1.392588000  | 7.299077000  | -0.150958000 |
| H | 2.884661000  | 11.606898000 | -0.969606000 |
| H | 3.138496000  | 11.515096000 | 0.786640000  |
| H | 2.541936000  | 13.933417000 | 0.996657000  |
| H | 2.266747000  | 14.024341000 | -0.740810000 |
| H | 4.680810000  | 13.430073000 | -1.153049000 |
| H | 4.957908000  | 13.342835000 | 0.580126000  |
| H | 4.342827000  | 15.766154000 | 0.802195000  |
| H | 4.056524000  | 15.854392000 | -0.927377000 |
| H | 6.771185000  | 15.202811000 | 0.377049000  |
| H | 6.329369000  | 16.744607000 | -0.368974000 |
| H | 6.480939000  | 15.290574000 | -1.365025000 |

Cartesian coordinates of DFT-optimized structure of **3A3** by B3LYP /6-31G\*\*/CHCl<sub>3</sub>:  
Charge = 0; multiplicity=1

|   |               |              |              |
|---|---------------|--------------|--------------|
| C | -4.158496000  | -0.067576000 | -0.014122000 |
| C | -5.165145000  | -1.031271000 | 0.122521000  |
| C | -6.507803000  | -0.631340000 | 0.153119000  |
| N | -6.882280000  | 0.654034000  | 0.068561000  |
| C | -5.926451000  | 1.586899000  | -0.056157000 |
| C | -4.562155000  | 1.270106000  | -0.106863000 |
| C | -7.597336000  | -1.644653000 | 0.300575000  |
| C | -7.487571000  | -2.909013000 | -0.297802000 |
| C | -8.524508000  | -3.825545000 | -0.139093000 |
| C | -9.638688000  | -3.454415000 | 0.610334000  |
| C | -9.659834000  | -2.172725000 | 1.164196000  |
| N | -8.674072000  | -1.281315000 | 1.020814000  |
| C | -6.378160000  | 3.008650000  | -0.161455000 |
| N | -7.525277000  | 3.236377000  | -0.826685000 |
| C | -7.943397000  | 4.501297000  | -0.936637000 |
| C | -7.262944000  | 5.596691000  | -0.400860000 |
| C | -6.079300000  | 5.356707000  | 0.293417000  |
| C | -5.628346000  | 4.044363000  | 0.416219000  |
| C | -2.725908000  | -0.449955000 | -0.059461000 |
| C | -2.313874000  | -1.629680000 | -0.702256000 |
| C | -0.973052000  | -1.993262000 | -0.755353000 |
| C | -0.015594000  | -1.178133000 | -0.144421000 |
| C | -0.400377000  | -0.005781000 | 0.511675000  |
| C | -1.744126000  | 0.354051000  | 0.541581000  |
| N | 1.355796000   | -1.552258000 | -0.192376000 |
| C | 2.462085000   | -0.768028000 | -0.121717000 |
| C | 3.520829000   | -1.649745000 | -0.210939000 |
| N | 3.010359000   | -2.915012000 | -0.330721000 |
| N | 1.711284000   | -2.863276000 | -0.318462000 |
| C | 4.959035000   | -1.360844000 | -0.194050000 |
| C | 5.904745000   | -2.389040000 | -0.315319000 |
| C | 7.255997000   | -2.057265000 | -0.291708000 |
| C | 7.621341000   | -0.718426000 | -0.149462000 |
| C | 6.605960000   | 0.232773000  | -0.036774000 |
| N | 5.302291000   | -0.065109000 | -0.056514000 |
| H | -4.905771000  | -2.076264000 | 0.247974000  |
| H | -3.827734000  | 2.052237000  | -0.262617000 |
| H | -6.618885000  | -3.160579000 | -0.896436000 |
| H | -8.465312000  | -4.806694000 | -0.600275000 |
| H | -10.471924000 | -4.132559000 | 0.761483000  |
| H | -10.513732000 | -1.847933000 | 1.756185000  |
| H | -8.871975000  | 4.650362000  | -1.484903000 |
| H | -7.655005000  | 6.600863000  | -0.523133000 |
| H | -5.520144000  | 6.173529000  | 0.739526000  |
| H | -4.723035000  | 3.823460000  | 0.971163000  |
| H | -3.047391000  | -2.257017000 | -1.197940000 |
| H | -0.661183000  | -2.893448000 | -1.270043000 |



|   |              |              |              |
|---|--------------|--------------|--------------|
| H | 0.334750000  | 0.609544000  | 1.018167000  |
| H | -2.034879000 | 1.253986000  | 1.073173000  |
| H | 2.430239000  | 0.305015000  | -0.044638000 |
| H | 5.572041000  | -3.414823000 | -0.423783000 |
| H | 8.011693000  | -2.831495000 | -0.383049000 |
| H | 6.853033000  | 1.286792000  | 0.075235000  |
| H | 8.662500000  | -0.414927000 | -0.125996000 |

Cartesian coordinates of DFT-optimized structure of **3A4** by B3LYP /6-31G\*\*/CHCl<sub>3</sub>:  
Charge = 0; multiplicity=1

|   |              |              |              |
|---|--------------|--------------|--------------|
| C | -4.335933000 | -0.860298000 | -0.845813000 |
| C | -5.491282000 | -1.336606000 | -1.461445000 |
| C | -5.397014000 | -2.448059000 | -2.296198000 |
| C | -4.141566000 | -3.033940000 | -2.469930000 |
| N | -3.023450000 | -2.590152000 | -1.885944000 |
| C | -3.116988000 | -1.512605000 | -1.084974000 |
| C | -1.854239000 | -1.030684000 | -0.445113000 |
| C | -1.637445000 | 0.339756000  | -0.250400000 |
| C | -0.448501000 | 0.775240000  | 0.347629000  |
| C | 0.477614000  | -0.207632000 | 0.718293000  |
| C | 0.190332000  | -1.557828000 | 0.475808000  |
| N | -0.955922000 | -1.963064000 | -0.092499000 |
| C | 1.165271000  | -2.622643000 | 0.866500000  |
| N | 0.653406000  | -3.793975000 | 1.288159000  |
| C | 1.508434000  | -4.757507000 | 1.646575000  |
| C | 2.897554000  | -4.621556000 | 1.606264000  |
| C | 3.424197000  | -3.410830000 | 1.161906000  |
| C | 2.547498000  | -2.395487000 | 0.786032000  |
| C | -0.184257000 | 2.217411000  | 0.575673000  |
| C | -1.225499000 | 3.094489000  | 0.924593000  |
| C | -0.990562000 | 4.450021000  | 1.125318000  |
| C | 0.307632000  | 4.950051000  | 0.987960000  |
| C | 1.363013000  | 4.096657000  | 0.655767000  |
| C | 1.111040000  | 2.744096000  | 0.446292000  |
| N | 0.546425000  | 6.337647000  | 1.190144000  |
| N | -0.224874000 | 7.053835000  | 2.051104000  |
| N | 0.209109000  | 8.280115000  | 2.035446000  |
| C | 1.268533000  | 8.389936000  | 1.168870000  |
| C | 1.488594000  | 7.137490000  | 0.623039000  |
| C | 1.960663000  | 9.662629000  | 0.934293000  |
| C | 1.536388000  | 10.824730000 | 1.605810000  |
| C | 2.171742000  | 12.047565000 | 1.400993000  |
| C | 3.247112000  | 12.116333000 | 0.511780000  |
| C | 3.680737000  | 10.958650000 | -0.166227000 |
| C | 3.047179000  | 9.742449000  | 0.040752000  |
| H | -4.382419000 | -0.011791000 | -0.172047000 |
| H | -6.446846000 | -0.852743000 | -1.284261000 |
| H | -6.268151000 | -2.856416000 | -2.797384000 |
| H | -4.030136000 | -3.903874000 | -3.114741000 |
| H | -2.367737000 | 1.060162000  | -0.600129000 |
| H | 1.392571000  | 0.070756000  | 1.228406000  |
| H | 1.061250000  | -5.689595000 | 1.987509000  |
| H | 3.539181000  | -5.441923000 | 1.909801000  |
| H | 4.497505000  | -3.259722000 | 1.100164000  |
| H | 2.928968000  | -1.451011000 | 0.414098000  |
| H | -2.232602000 | 2.712011000  | 1.053055000  |
| H | -1.798652000 | 5.120789000  | 1.389726000  |

|   |             |              |              |
|---|-------------|--------------|--------------|
| H | 2.374300000 | 4.478221000  | 0.570199000  |
| H | 1.933323000 | 2.094598000  | 0.165364000  |
| H | 2.186692000 | 6.774565000  | -0.112676000 |
| C | 4.093307000 | 13.242318000 | 0.101222000  |
| C | 5.043891000 | 12.769997000 | -0.827258000 |
| C | 4.864748000 | 11.273100000 | -1.081278000 |
| C | 4.073045000 | 14.587499000 | 0.479285000  |
| C | 5.012727000 | 15.457644000 | -0.078792000 |
| C | 5.957283000 | 14.990275000 | -0.999786000 |
| C | 5.976686000 | 13.641984000 | -1.378663000 |
| C | 4.523771000 | 10.989771000 | -2.561932000 |
| C | 6.123033000 | 10.475741000 | -0.669824000 |
| H | 0.699566000 | 10.754342000 | 2.291690000  |
| H | 1.827502000 | 12.931252000 | 1.930620000  |
| H | 3.386802000 | 8.853655000  | -0.484003000 |
| H | 3.341817000 | 14.954846000 | 1.193869000  |
| H | 5.010421000 | 16.506134000 | 0.204480000  |
| H | 6.681411000 | 15.679210000 | -1.424690000 |
| H | 6.714295000 | 13.290023000 | -2.095079000 |
| H | 3.631925000 | 11.540811000 | -2.873874000 |
| H | 4.339361000 | 9.921801000  | -2.717869000 |
| H | 5.354071000 | 11.285530000 | -3.211335000 |
| H | 6.384596000 | 10.662708000 | 0.375646000  |
| H | 6.977944000 | 10.757573000 | -1.292915000 |
| H | 5.956232000 | 9.400873000  | -0.794535000 |

Cartesian coordinates of DFT-optimized structure of **3A5** by B3LYP /6-31G\*\*/CHCl<sub>3</sub>:  
Charge = 0; multiplicity=1

|   |              |              |              |
|---|--------------|--------------|--------------|
| C | -1.861609000 | -0.907393000 | 0.142530000  |
| C | -2.996007000 | -1.477144000 | -0.449100000 |
| C | -3.038131000 | -2.858660000 | -0.680514000 |
| N | -2.018323000 | -3.675021000 | -0.373263000 |
| C | -0.922700000 | -3.139987000 | 0.186920000  |
| C | -0.808980000 | -1.772024000 | 0.467822000  |
| C | -4.241980000 | -3.485825000 | -1.308449000 |
| C | -5.528265000 | -2.988767000 | -1.049035000 |
| C | -6.625082000 | -3.597887000 | -1.654568000 |
| C | -6.407548000 | -4.683918000 | -2.499632000 |
| C | -5.092601000 | -5.112036000 | -2.692588000 |
| N | -4.029344000 | -4.539487000 | -2.118533000 |
| C | 0.191990000  | -4.077754000 | 0.525494000  |
| N | -0.151866000 | -5.316848000 | 0.922926000  |
| C | 0.830559000  | -6.168511000 | 1.235225000  |
| C | 2.188449000  | -5.849829000 | 1.170410000  |
| C | 2.541235000  | -4.568969000 | 0.750992000  |
| C | 1.530210000  | -3.668391000 | 0.423048000  |
| C | -1.777689000 | 0.548958000  | 0.412894000  |
| C | -2.915512000 | 1.281270000  | 0.792595000  |
| C | -2.846140000 | 2.647634000  | 1.040103000  |
| C | -1.618790000 | 3.307032000  | 0.921279000  |
| C | -0.470355000 | 2.599347000  | 0.555804000  |
| C | -0.557584000 | 1.234765000  | 0.298532000  |
| N | -1.545248000 | 4.703378000  | 1.178000000  |
| C | -0.664686000 | 5.619658000  | 0.690643000  |
| C | -1.039464000 | 6.818702000  | 1.269886000  |
| N | -2.124518000 | 6.565144000  | 2.072498000  |
| N | -2.428680000 | 5.300055000  | 2.020278000  |
| C | -0.467717000 | 8.162827000  | 1.123112000  |
| C | -1.141038000 | 9.274448000  | 1.682513000  |
| C | -0.644860000 | 10.567425000 | 1.571325000  |
| C | 0.559578000  | 10.754723000 | 0.882743000  |
| C | 1.253710000  | 9.654197000  | 0.308464000  |
| C | 0.736477000  | 8.363771000  | 0.436435000  |
| H | -3.820558000 | -0.848236000 | -0.764301000 |
| H | 0.072099000  | -1.393002000 | 0.972442000  |
| H | -5.669452000 | -2.156748000 | -0.368060000 |
| H | -7.629918000 | -3.234825000 | -1.461901000 |
| H | -7.229035000 | -5.191463000 | -2.994002000 |
| H | -4.884583000 | -5.958062000 | -3.345297000 |
| H | 0.517747000  | -7.160032000 | 1.557774000  |
| H | 2.939138000  | -6.586285000 | 1.436770000  |
| H | 3.583708000  | -4.276346000 | 0.671916000  |
| H | 1.775204000  | -2.672330000 | 0.070946000  |
| H | -3.867816000 | 0.775230000  | 0.910835000  |
| H | -3.728356000 | 3.204870000  | 1.329600000  |

|   |              |              |              |
|---|--------------|--------------|--------------|
| H | 0.487294000  | 3.102031000  | 0.481038000  |
| H | 0.336226000  | 0.701426000  | -0.007195000 |
| H | 0.098221000  | 5.364064000  | -0.025294000 |
| H | -2.072679000 | 9.102460000  | 2.209750000  |
| H | -1.187146000 | 11.400227000 | 2.006232000  |
| H | 1.274496000  | 7.521861000  | 0.010526000  |
| C | 2.441654000  | 10.197757000 | -0.316917000 |
| C | 2.408795000  | 11.601011000 | -0.091795000 |
| N | 1.272108000  | 11.920485000 | 0.644066000  |
| C | 3.419266000  | 12.441467000 | -0.572156000 |
| C | 4.469563000  | 11.855958000 | -1.276696000 |
| C | 4.518116000  | 10.468816000 | -1.504917000 |
| C | 3.508571000  | 9.635950000  | -1.028790000 |
| C | 0.867937000  | 13.264159000 | 1.038480000  |
| C | 0.028544000  | 13.993505000 | -0.020361000 |
| C | -0.358796000 | 15.409543000 | 0.421255000  |
| C | -1.195018000 | 16.162094000 | -0.621341000 |
| C | -1.574615000 | 17.582835000 | -0.186700000 |
| C | -2.409303000 | 18.339889000 | -1.226837000 |
| C | -2.784138000 | 19.762665000 | -0.794328000 |
| C | -3.617041000 | 20.512938000 | -1.838180000 |
| H | 3.392429000  | 13.513683000 | -0.408844000 |
| H | 5.265881000  | 12.487653000 | -1.659168000 |
| H | 5.350592000  | 10.046230000 | -2.058935000 |
| H | 3.548204000  | 8.565152000  | -1.207756000 |
| H | 1.774663000  | 13.835190000 | 1.263653000  |
| H | 0.311184000  | 13.185569000 | 1.977504000  |
| H | -0.874425000 | 13.405829000 | -0.228191000 |
| H | 0.596493000  | 14.037254000 | -0.958119000 |
| H | 0.552341000  | 15.984688000 | 0.638624000  |
| H | -0.918359000 | 15.356825000 | 1.365847000  |
| H | -2.108902000 | 15.589887000 | -0.834305000 |
| H | -0.637612000 | 16.208284000 | -1.567508000 |
| H | -0.659158000 | 18.152753000 | 0.027406000  |
| H | -2.131068000 | 17.535895000 | 0.760296000  |
| H | -3.326901000 | 17.772620000 | -1.439293000 |
| H | -1.854574000 | 18.384676000 | -2.175129000 |
| H | -1.866948000 | 20.328956000 | -0.582200000 |
| H | -3.338572000 | 19.717863000 | 0.153007000  |
| H | -3.074778000 | 20.603365000 | -2.786450000 |
| H | -3.866978000 | 21.524101000 | -1.500410000 |
| H | -4.557367000 | 19.989131000 | -2.045066000 |

Cartesian coordinates of DFT-optimized structure of **3A6** by B3LYP /6-31G\*\*/CHCl<sub>3</sub>:

Charge = 0; multiplicity=1

|   |              |              |              |
|---|--------------|--------------|--------------|
| C | -4.349675000 | -1.101380000 | 0.347882000  |
| C | -5.579763000 | -1.738488000 | 0.200526000  |
| C | -5.643041000 | -2.908543000 | -0.553042000 |
| C | -4.460979000 | -3.388546000 | -1.120561000 |
| N | -3.272620000 | -2.790144000 | -0.987644000 |
| C | -3.216141000 | -1.655832000 | -0.265659000 |
| C | -1.878823000 | -0.998812000 | -0.136789000 |
| C | -1.778443000 | 0.398264000  | -0.096883000 |
| C | -0.519037000 | 0.999529000  | 0.016784000  |
| C | 0.590583000  | 0.149116000  | 0.093292000  |
| C | 0.404909000  | -1.239021000 | 0.046724000  |
| N | -0.806733000 | -1.803881000 | -0.073559000 |
| C | 1.577515000  | -2.163321000 | 0.137636000  |
| N | 1.511459000  | -3.303669000 | -0.574252000 |
| C | 2.550225000  | -4.143093000 | -0.508854000 |
| C | 3.695025000  | -3.908495000 | 0.255464000  |
| C | 3.757108000  | -2.730724000 | 0.996960000  |
| C | 2.684299000  | -1.843855000 | 0.938811000  |
| C | -0.367739000 | 2.475335000  | 0.036599000  |
| C | -1.320003000 | 3.287826000  | 0.675326000  |
| C | -1.184775000 | 4.671126000  | 0.705089000  |
| C | -0.089256000 | 5.267846000  | 0.074226000  |
| C | 0.865721000  | 4.483396000  | -0.578018000 |
| C | 0.726491000  | 3.098766000  | -0.584958000 |
| N | 0.044624000  | 6.683717000  | 0.098839000  |
| N | -1.054020000 | 7.481019000  | 0.174368000  |
| N | -0.640476000 | 8.714568000  | 0.181253000  |
| C | 0.729480000  | 8.747551000  | 0.108625000  |
| C | 1.174316000  | 7.438868000  | 0.055070000  |
| C | 1.480568000  | 10.009360000 | 0.106797000  |
| C | 0.788577000  | 11.232825000 | 0.243395000  |
| C | 1.464305000  | 12.446377000 | 0.247936000  |
| C | 2.854833000  | 12.442856000 | 0.115394000  |
| C | 3.573987000  | 11.234122000 | -0.022908000 |
| C | 2.872972000  | 10.022100000 | -0.026583000 |
| H | -4.265545000 | -0.201861000 | 0.947651000  |
| H | -6.468600000 | -1.331493000 | 0.672681000  |
| H | -6.577365000 | -3.440726000 | -0.696798000 |
| H | -4.472076000 | -4.300470000 | -1.714922000 |
| H | -2.666590000 | 1.009639000  | -0.207050000 |
| H | 1.588650000  | 0.561992000  | 0.183152000  |
| H | 2.466347000  | -5.052815000 | -1.100760000 |
| H | 4.504771000  | -4.630276000 | 0.268409000  |
| H | 4.619995000  | -2.508033000 | 1.617019000  |
| H | 2.695093000  | -0.931103000 | 1.524267000  |
| H | -2.161832000 | 2.832287000  | 1.185966000  |
| H | -1.911089000 | 5.289321000  | 1.217894000  |
| H | 1.695992000  | 4.946162000  | -1.099760000 |

|   |              |              |              |
|---|--------------|--------------|--------------|
| H | 1.460003000  | 2.500568000  | -1.115082000 |
| H | 2.158818000  | 7.003010000  | 0.023752000  |
| H | -0.290286000 | 11.214750000 | 0.346566000  |
| H | 3.420151000  | 9.090806000  | -0.136668000 |
| C | 5.007505000  | 11.459117000 | -0.147205000 |
| C | 5.336887000  | 12.832793000 | -0.098503000 |
| S | 3.908681000  | 13.860853000 | 0.096966000  |
| C | 6.658252000  | 13.273944000 | -0.198885000 |
| C | 7.665083000  | 12.323081000 | -0.350874000 |
| C | 7.357597000  | 10.954213000 | -0.401734000 |
| C | 6.039852000  | 10.520605000 | -0.300979000 |
| H | 0.916131000  | 13.376845000 | 0.353918000  |
| H | 6.896912000  | 14.331924000 | -0.159883000 |
| H | 8.698039000  | 12.647475000 | -0.430646000 |
| H | 8.155527000  | 10.227963000 | -0.520660000 |
| H | 5.810213000  | 9.459969000  | -0.341076000 |

Cartesian coordinates of DFT-optimized structure of **3A7** by B3LYP /6-31G\*\*/CHCl<sub>3</sub>:  
Charge = 0; multiplicity=1

|   |              |              |              |
|---|--------------|--------------|--------------|
| C | -1.702793000 | -1.223116000 | -0.213231000 |
| C | -2.942421000 | -1.714740000 | 0.213855000  |

|   |              |              |              |
|---|--------------|--------------|--------------|
| C | -3.111822000 | -3.091601000 | 0.412970000  |
| N | -2.122040000 | -3.977420000 | 0.221095000  |
| C | -0.931557000 | -3.518915000 | -0.195340000 |
| C | -0.682872000 | -2.159171000 | -0.423560000 |
| C | -4.430748000 | -3.634410000 | 0.863415000  |
| C | -5.631317000 | -3.039247000 | 0.446926000  |
| C | -6.840647000 | -3.571502000 | 0.888292000  |
| C | -6.817608000 | -4.681342000 | 1.730088000  |
| C | -5.574833000 | -5.209389000 | 2.085791000  |
| N | -4.405578000 | -4.711361000 | 1.670418000  |
| C | 0.145337000  | -4.532758000 | -0.417683000 |
| N | 0.165124000  | -5.591991000 | 0.412380000  |
| C | 1.123140000  | -6.507853000 | 0.234998000  |
| C | 2.099443000  | -6.431652000 | -0.760354000 |
| C | 2.071083000  | -5.338139000 | -1.623044000 |
| C | 1.080624000  | -4.373587000 | -1.451470000 |
| C | -1.475986000 | 0.228707000  | -0.420286000 |
| C | -2.497833000 | 1.053998000  | -0.920225000 |
| C | -2.295845000 | 2.415632000  | -1.115487000 |
| C | -1.048885000 | 2.974291000  | -0.819969000 |
| C | -0.013293000 | 2.174198000  | -0.330179000 |
| C | -0.234213000 | 0.815430000  | -0.127422000 |
| N | -0.839477000 | 4.366253000  | -1.026733000 |
| C | 0.020260000  | 5.208133000  | -0.392419000 |
| C | -0.182674000 | 6.436689000  | -0.995154000 |
| N | -1.150643000 | 6.276505000  | -1.958115000 |
| N | -1.542854000 | 5.036985000  | -1.977403000 |
| H | -3.752369000 | -1.030255000 | 0.437024000  |
| H | 0.295747000  | -1.834227000 | -0.757093000 |
| H | -5.619757000 | -2.191142000 | -0.228759000 |
| H | -7.781540000 | -3.131559000 | 0.572399000  |
| H | -7.732527000 | -5.132053000 | 2.099695000  |
| H | -5.518039000 | -6.076819000 | 2.741022000  |
| H | 1.113431000  | -7.348463000 | 0.926574000  |
| H | 2.850655000  | -7.208661000 | -0.854075000 |
| H | 2.800307000  | -5.239767000 | -2.421288000 |
| H | 1.019744000  | -3.524489000 | -2.123320000 |
| H | -3.461831000 | 0.625850000  | -1.174093000 |
| H | -3.089231000 | 3.045167000  | -1.498732000 |
| H | 0.961073000  | 2.599824000  | -0.118300000 |
| H | 0.569687000  | 0.208654000  | 0.275424000  |
| H | 0.653810000  | 4.893633000  | 0.420376000  |
| C | 0.433549000  | 7.727473000  | -0.753285000 |
| C | 0.118136000  | 8.928860000  | -1.345710000 |
| C | 0.907687000  | 10.011605000 | -0.881544000 |
| C | 1.838895000  | 9.654030000  | 0.071076000  |
| S | 1.744695000  | 7.927203000  | 0.390929000  |
| C | 2.804990000  | 10.480920000 | 0.764846000  |
| S | 3.219844000  | 12.080080000 | 0.162311000  |
| C | 4.331553000  | 12.342909000 | 1.469914000  |



|   |              |              |              |
|---|--------------|--------------|--------------|
| C | 4.388199000  | 11.263672000 | 2.308273000  |
| C | 3.521898000  | 10.205620000 | 1.910504000  |
| H | -0.667362000 | 9.021661000  | -2.085296000 |
| H | 0.781929000  | 11.031694000 | -1.226422000 |
| H | 4.870989000  | 13.277466000 | 1.534489000  |
| H | 5.021125000  | 11.224282000 | 3.187111000  |
| H | 3.417589000  | 9.277883000  | 2.461979000  |
